# Supplementary material for: Global N-linked Glycosylation is Not Significantly Impaired in Myoblasts in Congenital Myasthenic Syndromes Caused by Defective Glutamine-Fructose-6-Phosphate Transaminase 1 (GFPT1)
Source: PubMed Central journal article supplement (PMC4693256; doi:10.3390/biom5042758), 2015-10-16
Supplement: biomolecules-05-02758-s001.pdf [file biomolecules-05-02758-s001.pdf]

# Supplementary Materials

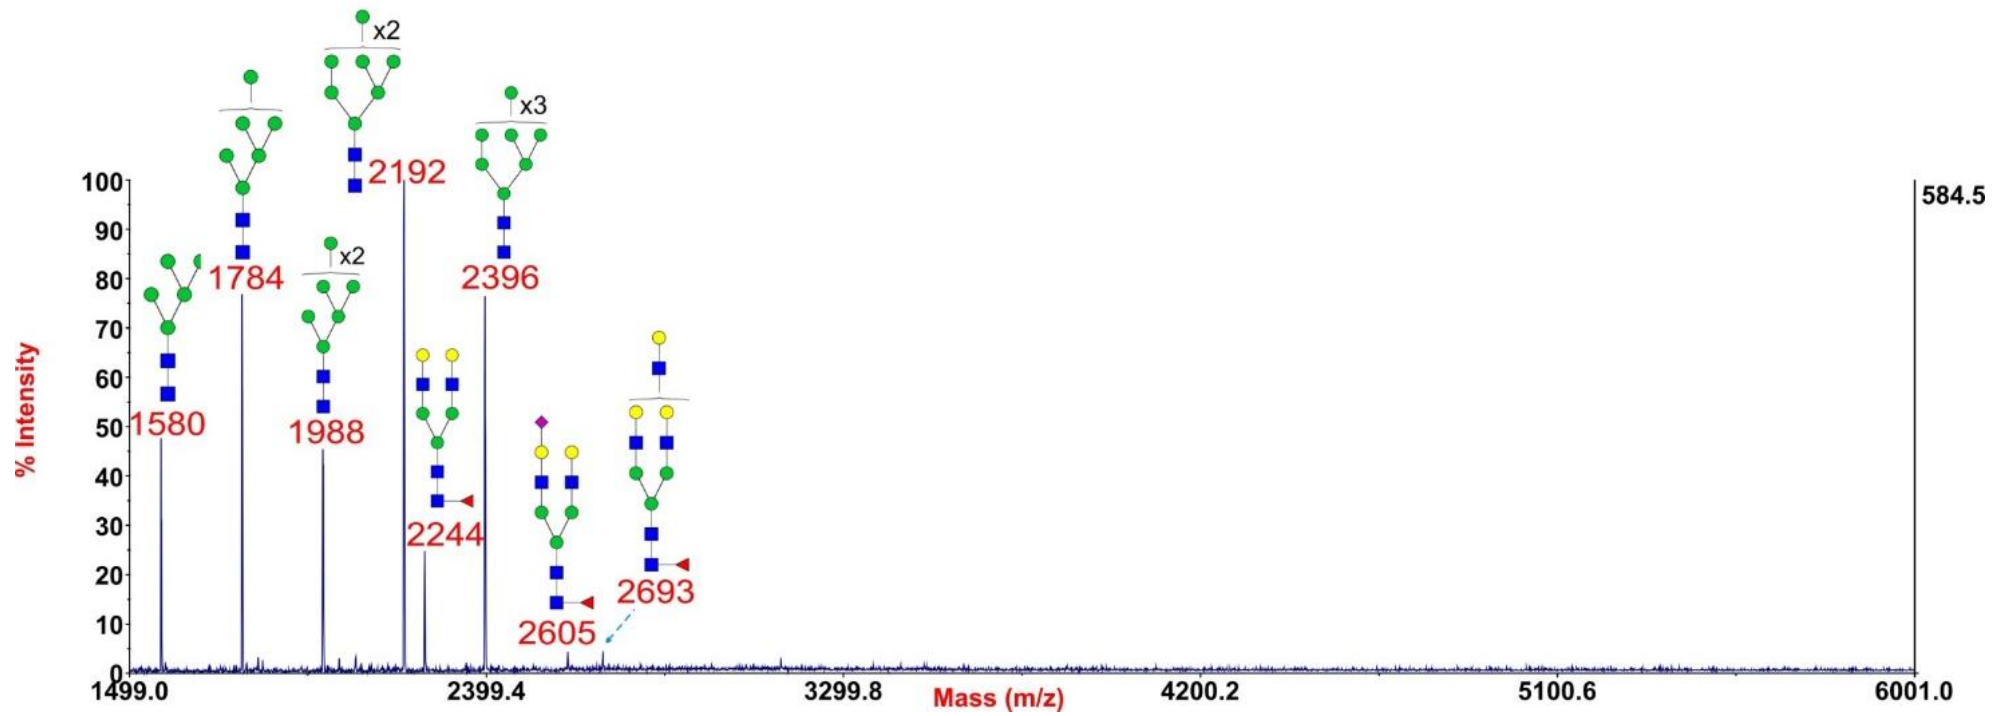

(A)

Figure S1. *Cont.*

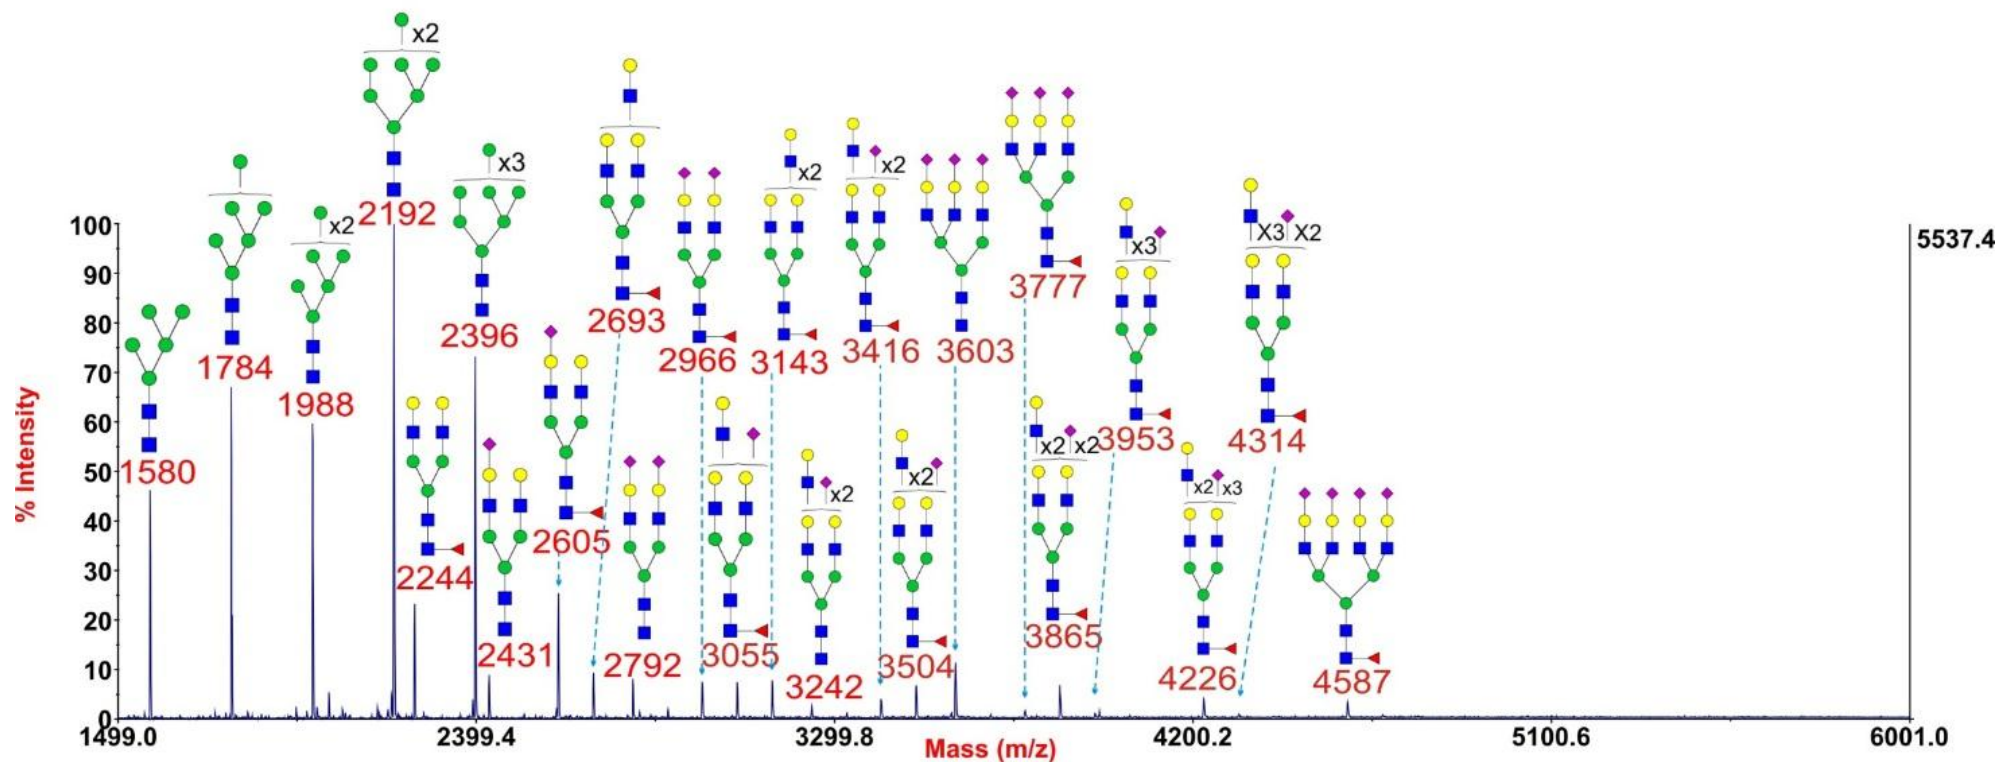

(B)

Figure S1. Cont.

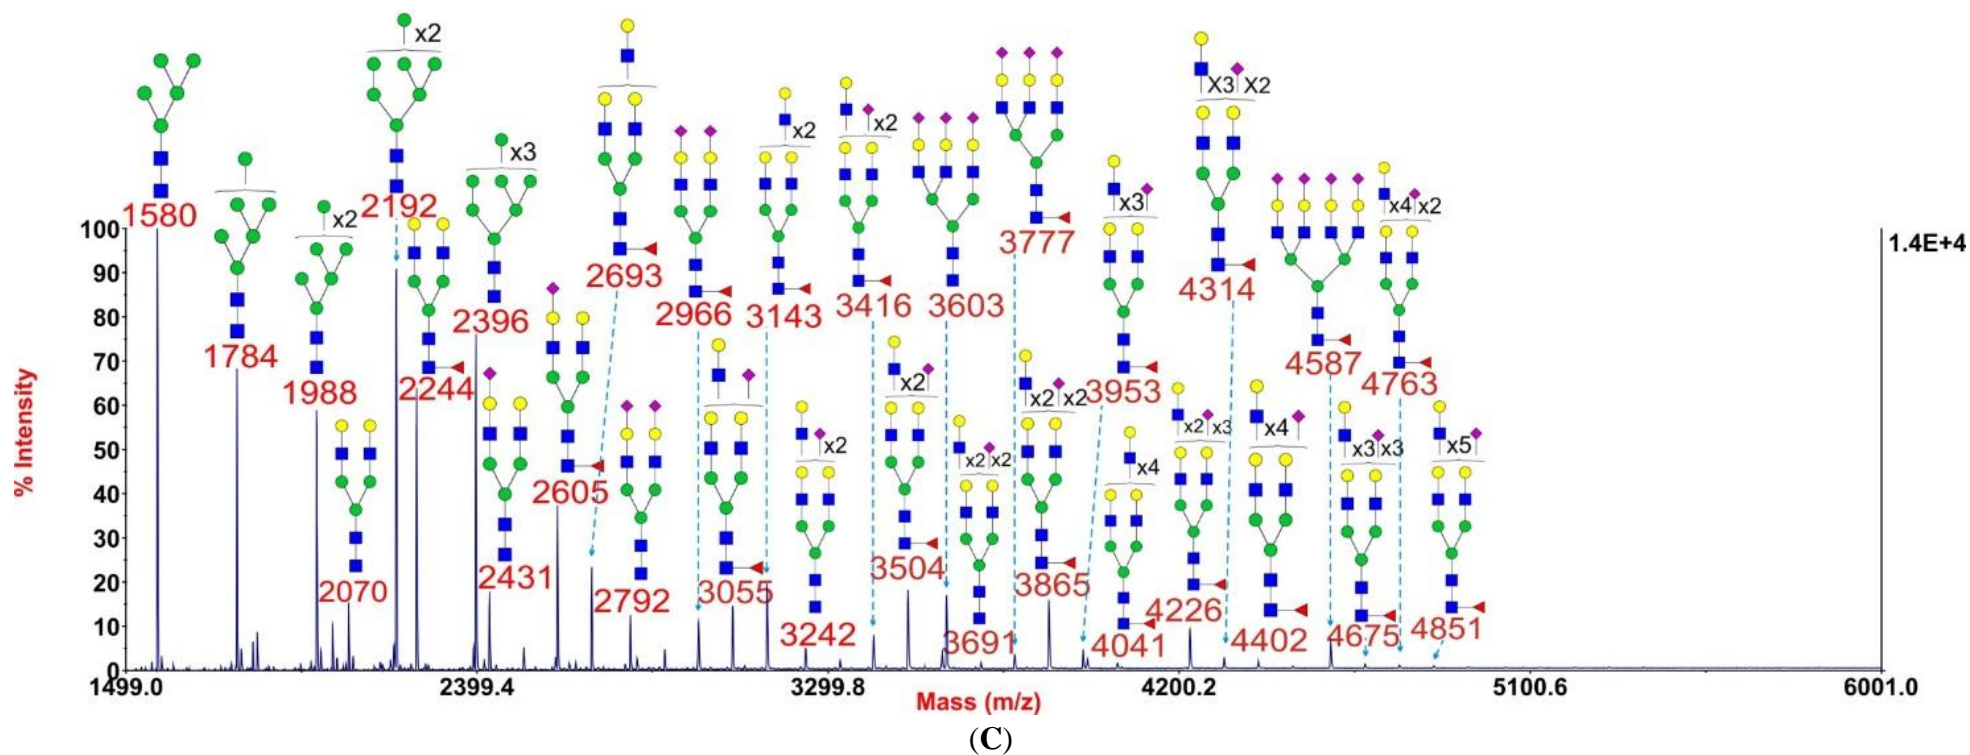

**Figure S1.** Annotated MALDI-TOF MS spectra of permethylated N-glycans from myoblasts of the CMS patient caused by mutations in *DOK7*, the myoblasts were cultured in the medium containing 5% (A); 10% (B) and 15% (C) FCS Profiles were obtained from the 50% acetonitrile fraction from a C18 Sep-Pak column. All ions are  $[M + Na]^+$ . The number indicated in the spectra is the mass to charge ratio ( $m/z$ ) of the corresponding ion. Since the ion is monocharged, the value of  $m/z$  is equal to the molecular weight value of the glycan. Annotations are based on the molecular weight, N-glycan biosynthetic pathway and MS/MS data. Glycans at  $m/z$  2966, 3777 and 4587 are clearly annotated, this is due to the fact that their structures are unequivocal because each antenna is capped with a sialic acid and thus they are homogeneous bi-, tri- and tetraantennary glycans. However, the glycan structure is not always as unequivocal as the glycan at  $m/z$  2966 as biosynthetically non-fully sialylated glycan molecular ion species could be made up of mixtures of structural isoforms. Therefore, for those heterogeneous multiantennary structures with extended LacNAc repeats, the annotations are simplified throughout by using biantennary structures with the extensions and NeuAcs listed outside a bracket. ■ GlcNAc, ● Man, ● Gal, ▲ Fuc, ◆ NeuAc.

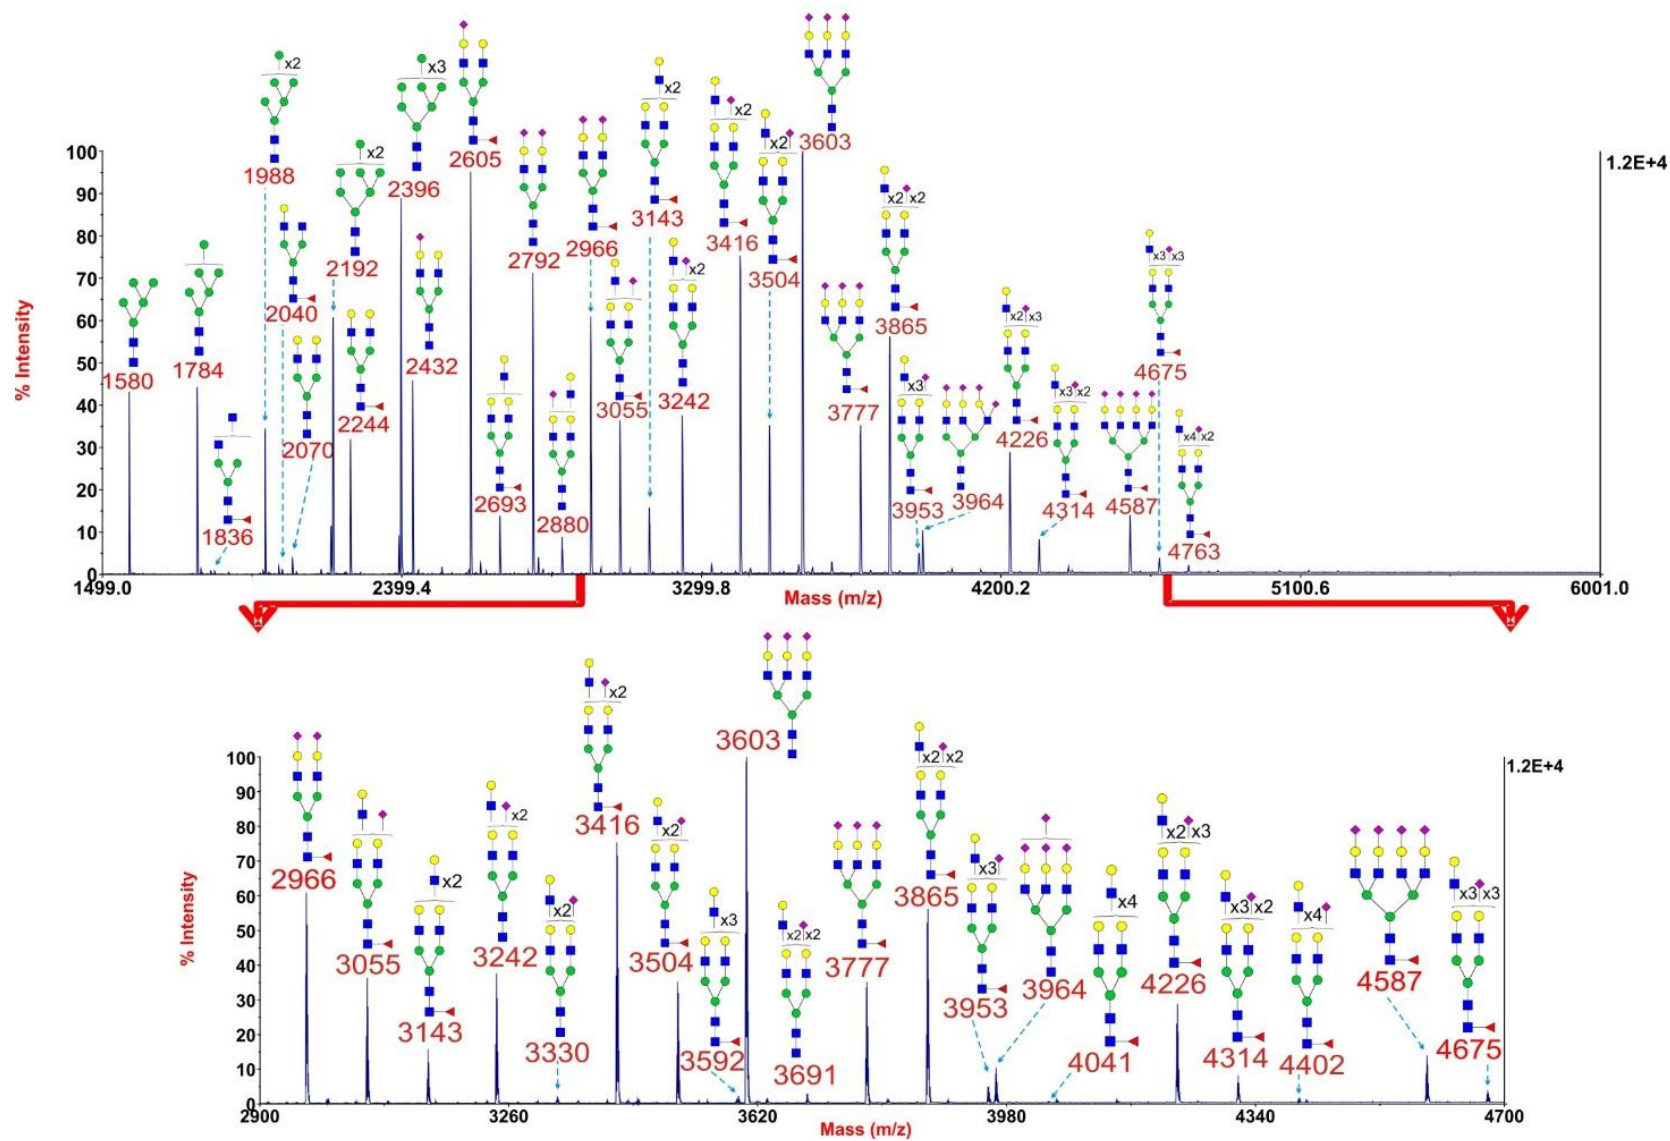

(A)

Figure S2. Cont.



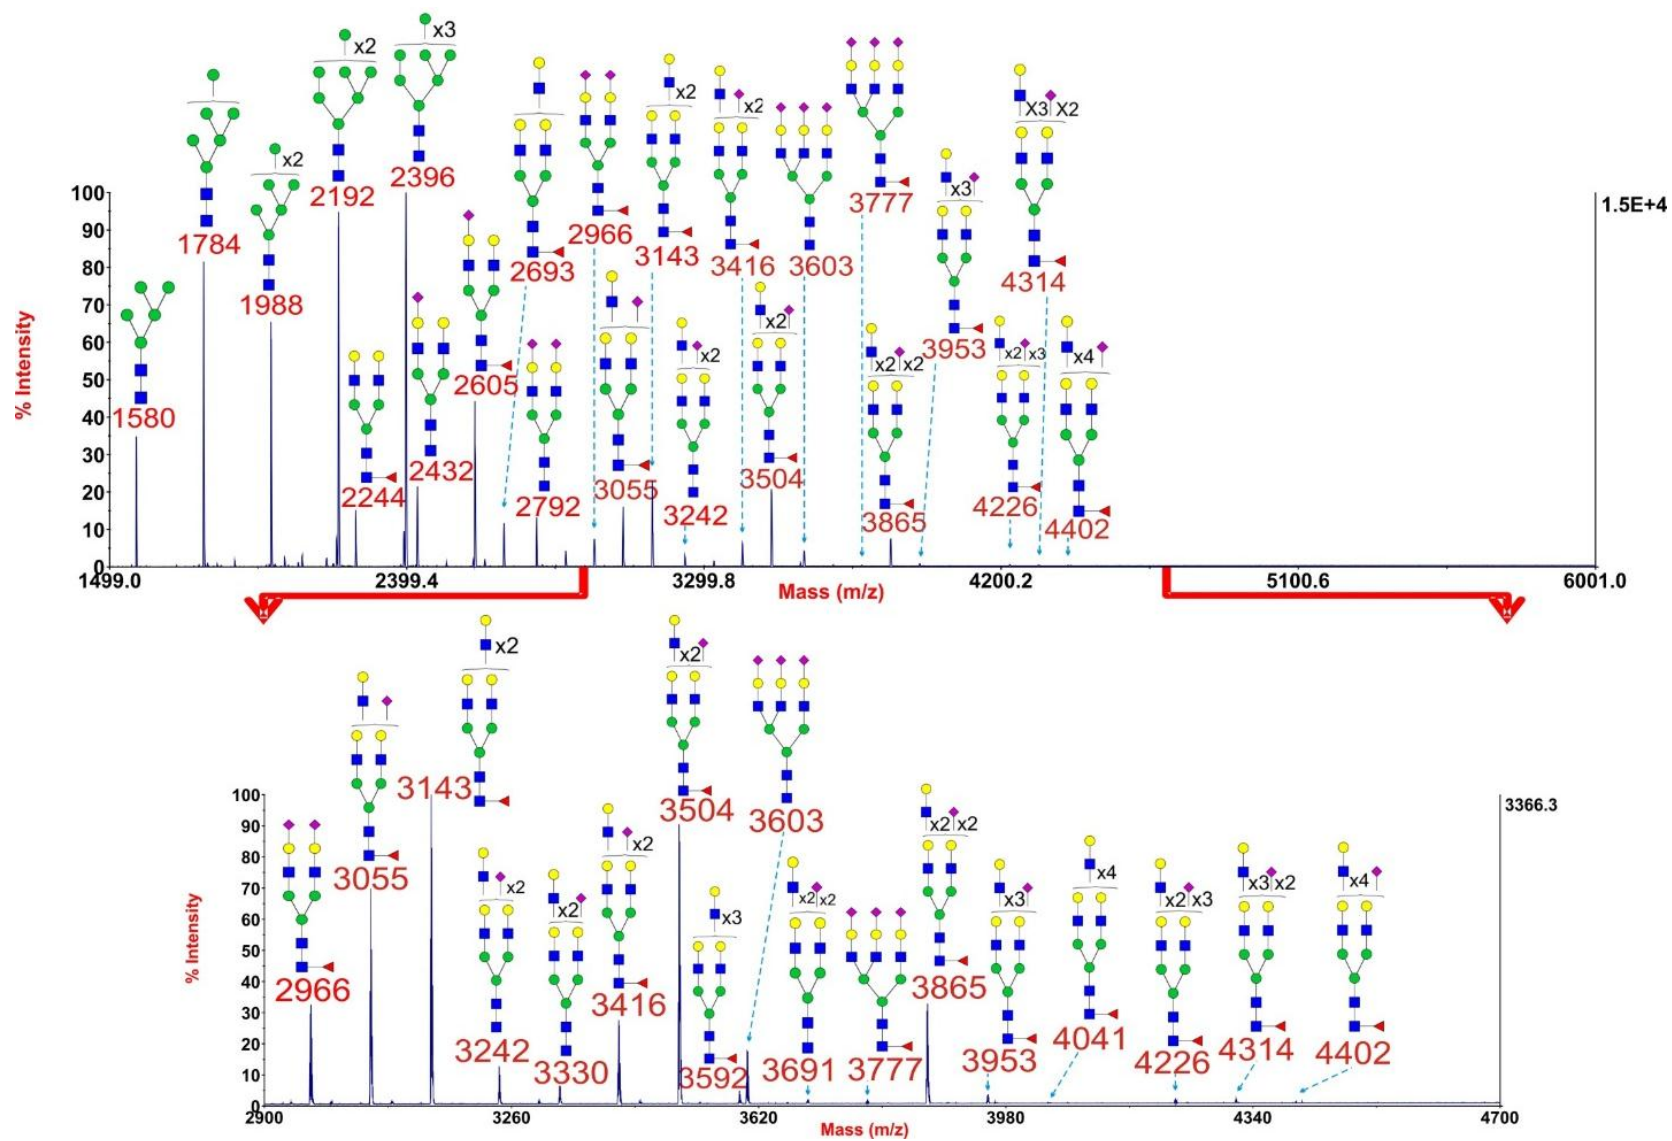

(B)

Figure S2. Cont.

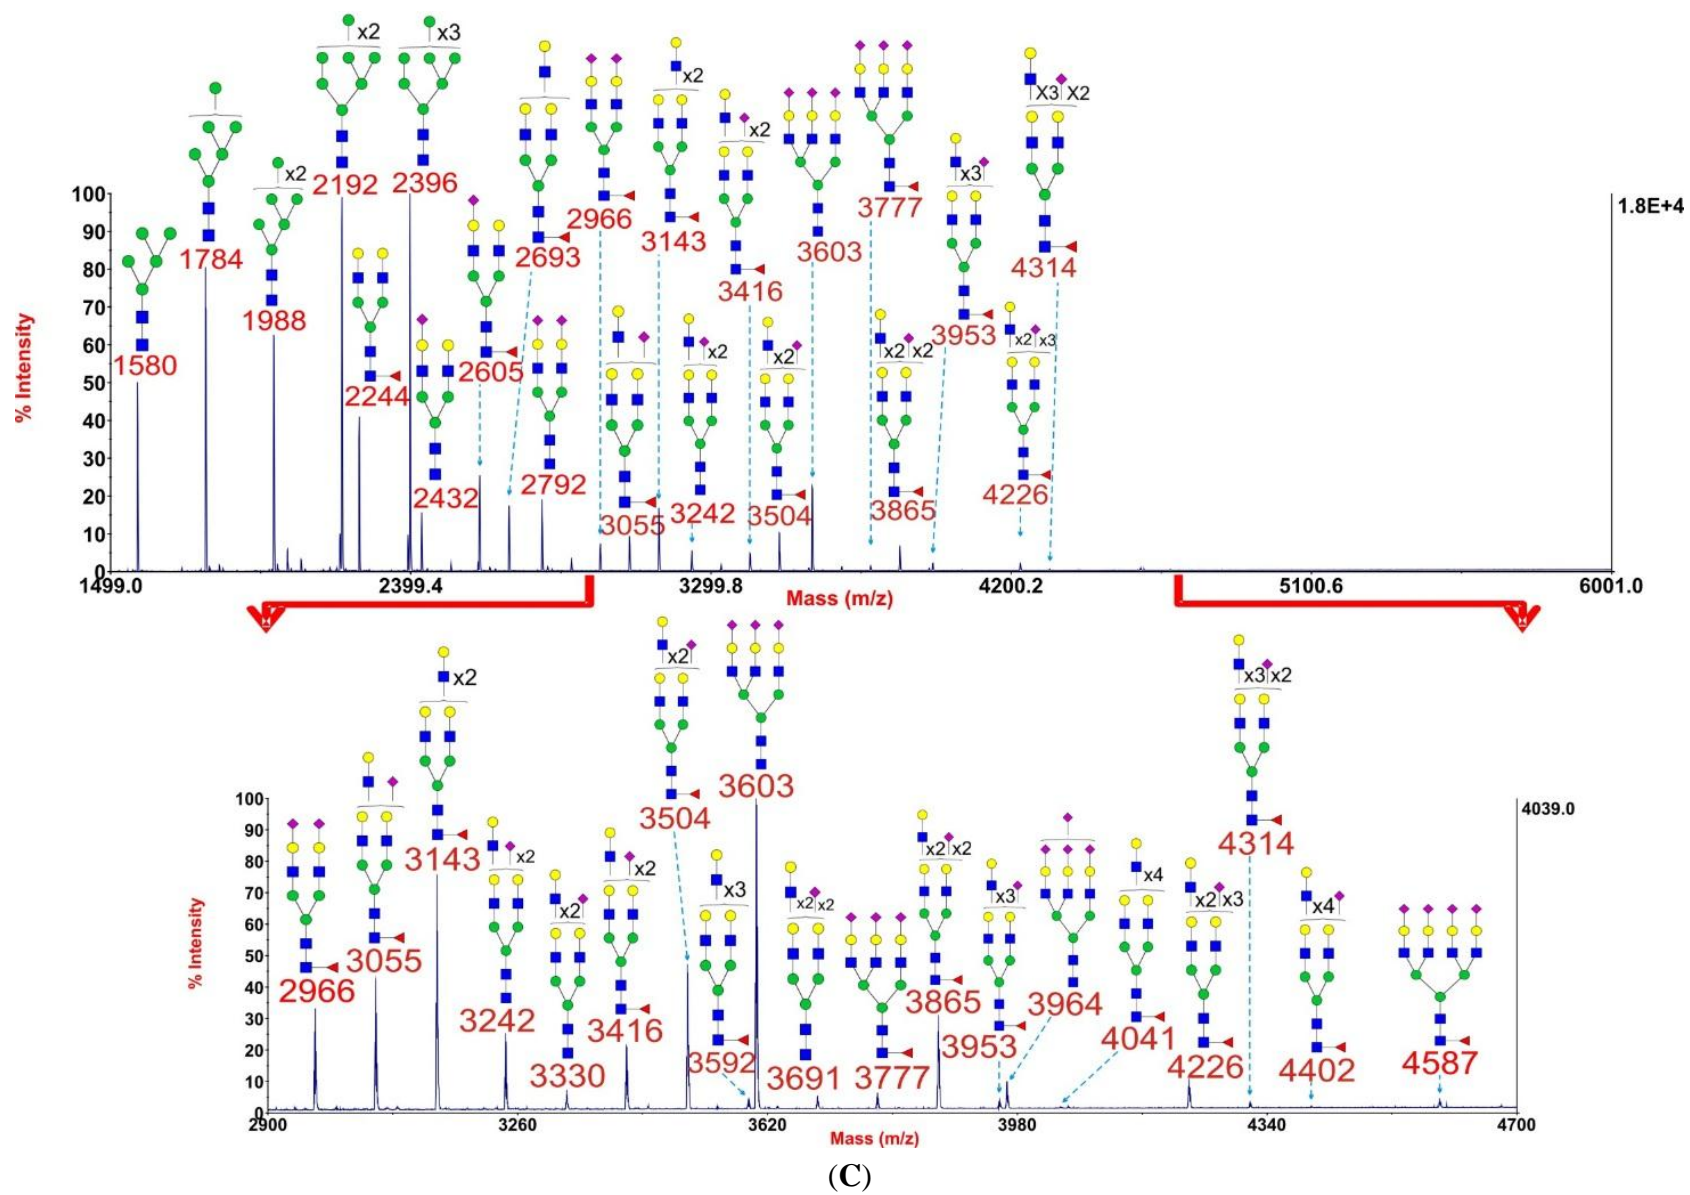

Figure S2. Cont.

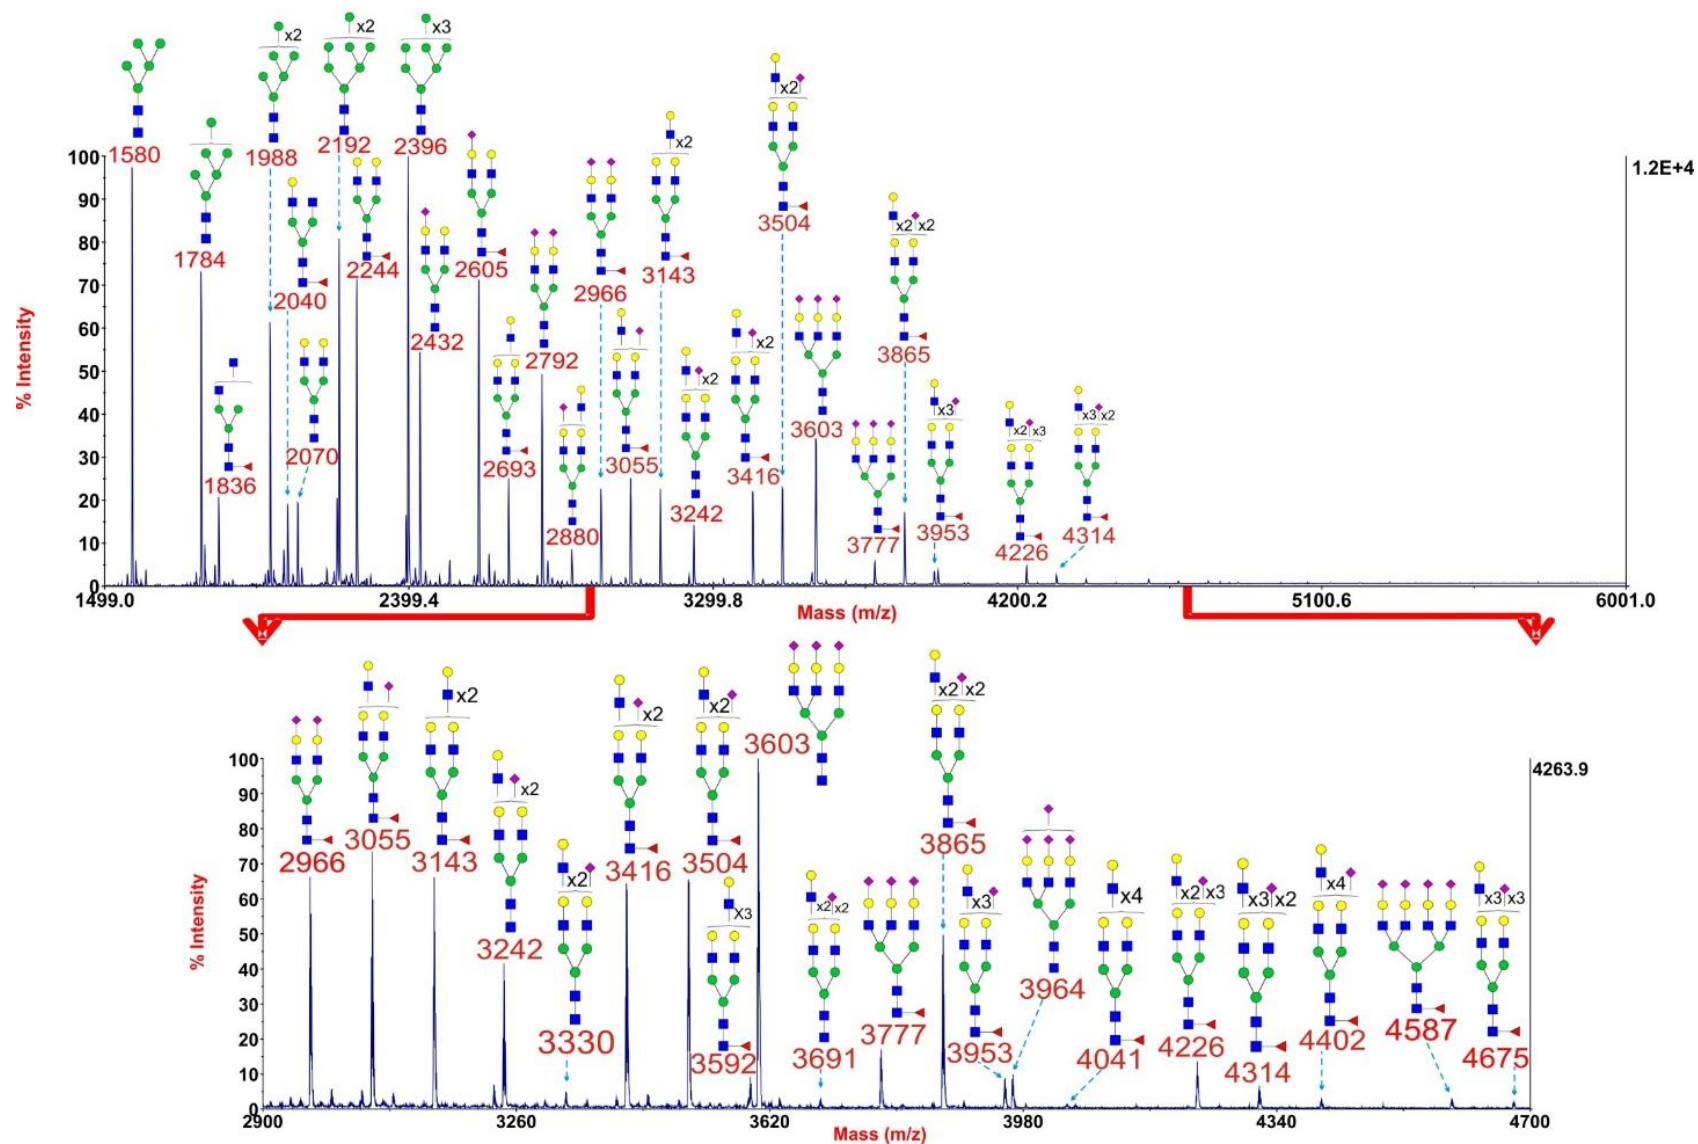

(D)

Figure S2. Cont.



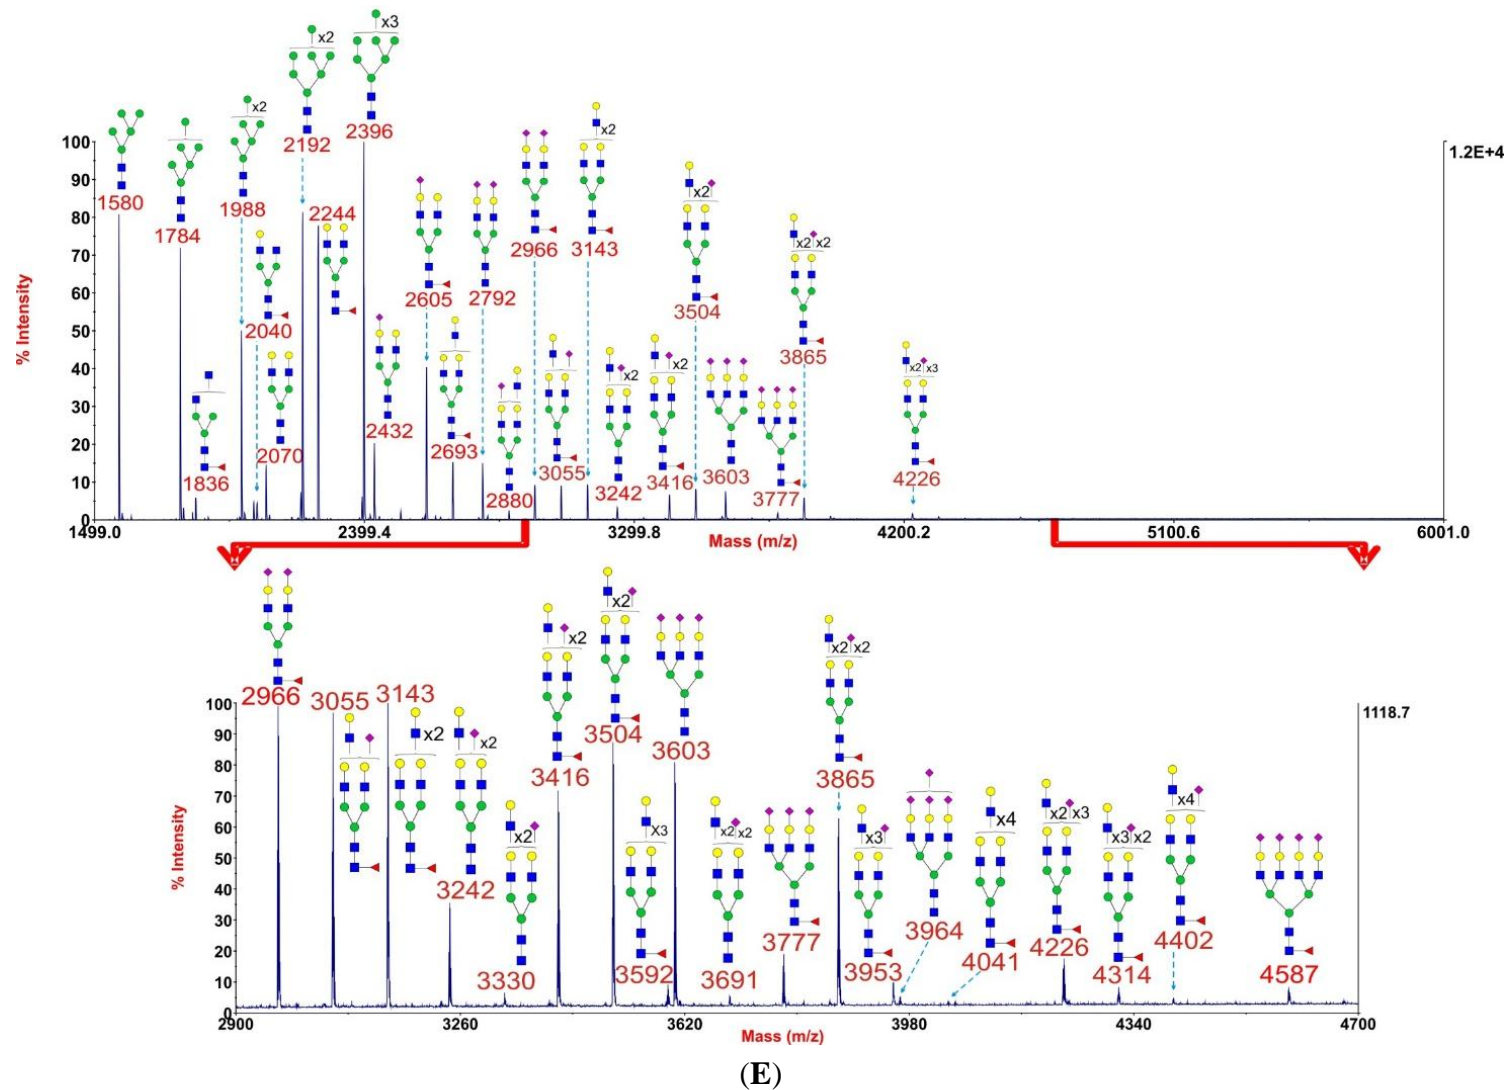

**Figure S2.** Annotated MALDI-TOF MS spectra of permethylated *N*-glycans from myoblasts of healthy control 2 (A); *GFPT1* patient 2 (B); the *MTND5* patient (C); limb girdle muscular dystrophy type 2A (LGMD2A) patient (D) and Pompe disease patient (E) In each of A, B, C, D and E, the top panel shows the full spectrum of glycans and the bottom panel amplifies the mass range where the majority of tri- and tetra-antennary



glycans are found, the starting point and ending point of which have been indicated by red arrows. Profiles were obtained from the 50% acetonitrile fraction from a C18 Sep-Pak column. All ions are  $[M + Na]^+$ . The number indicated in the spectra is the mass to charge ratio ( $m/z$ ) of the corresponding ion. Since the ion is monocharged, the value of  $m/z$  is equal to the molecular weight value of the glycan. Annotations are based on the molecular weight, *N*-glycan biosynthetic pathway and MS/MS data. Glycans at  $m/z$  2966, 3777 and 4587 are clearly annotated, this is due to the fact that their structures are unequivocal because each antenna is capped with a sialic acid and thus they are homogeneous bi-, tri- and tetraantennary glycans. However, the glycan structure is not always as unequivocal as the glycan at  $m/z$  2966 as biosynthetically non-fully sialylated glycan molecular ion species could be made up of mixtures of structural isoforms. Therefore, for those heterogeneous multiantennary structures with extended LacNAc repeats, the annotations are simplified throughout by using biantennary structures with the extensions and NeuAcs listed outside a bracket. ■ GlcNAc, ● Man, ● Gal, ▲ Fuc, ◆ NeuAc.

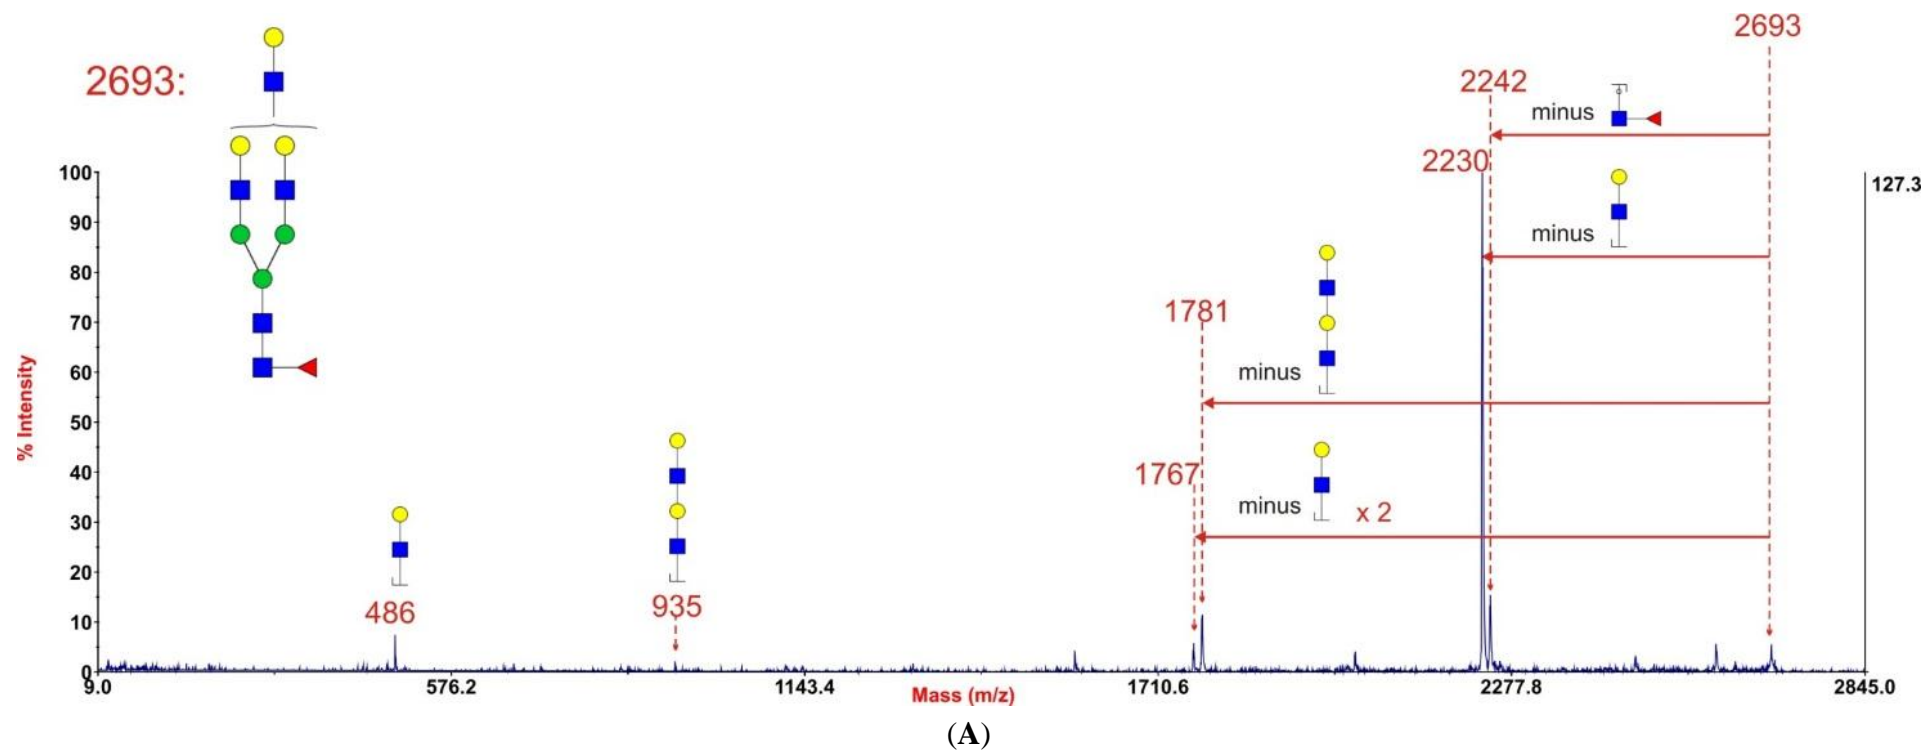

Figure S3. Cont.

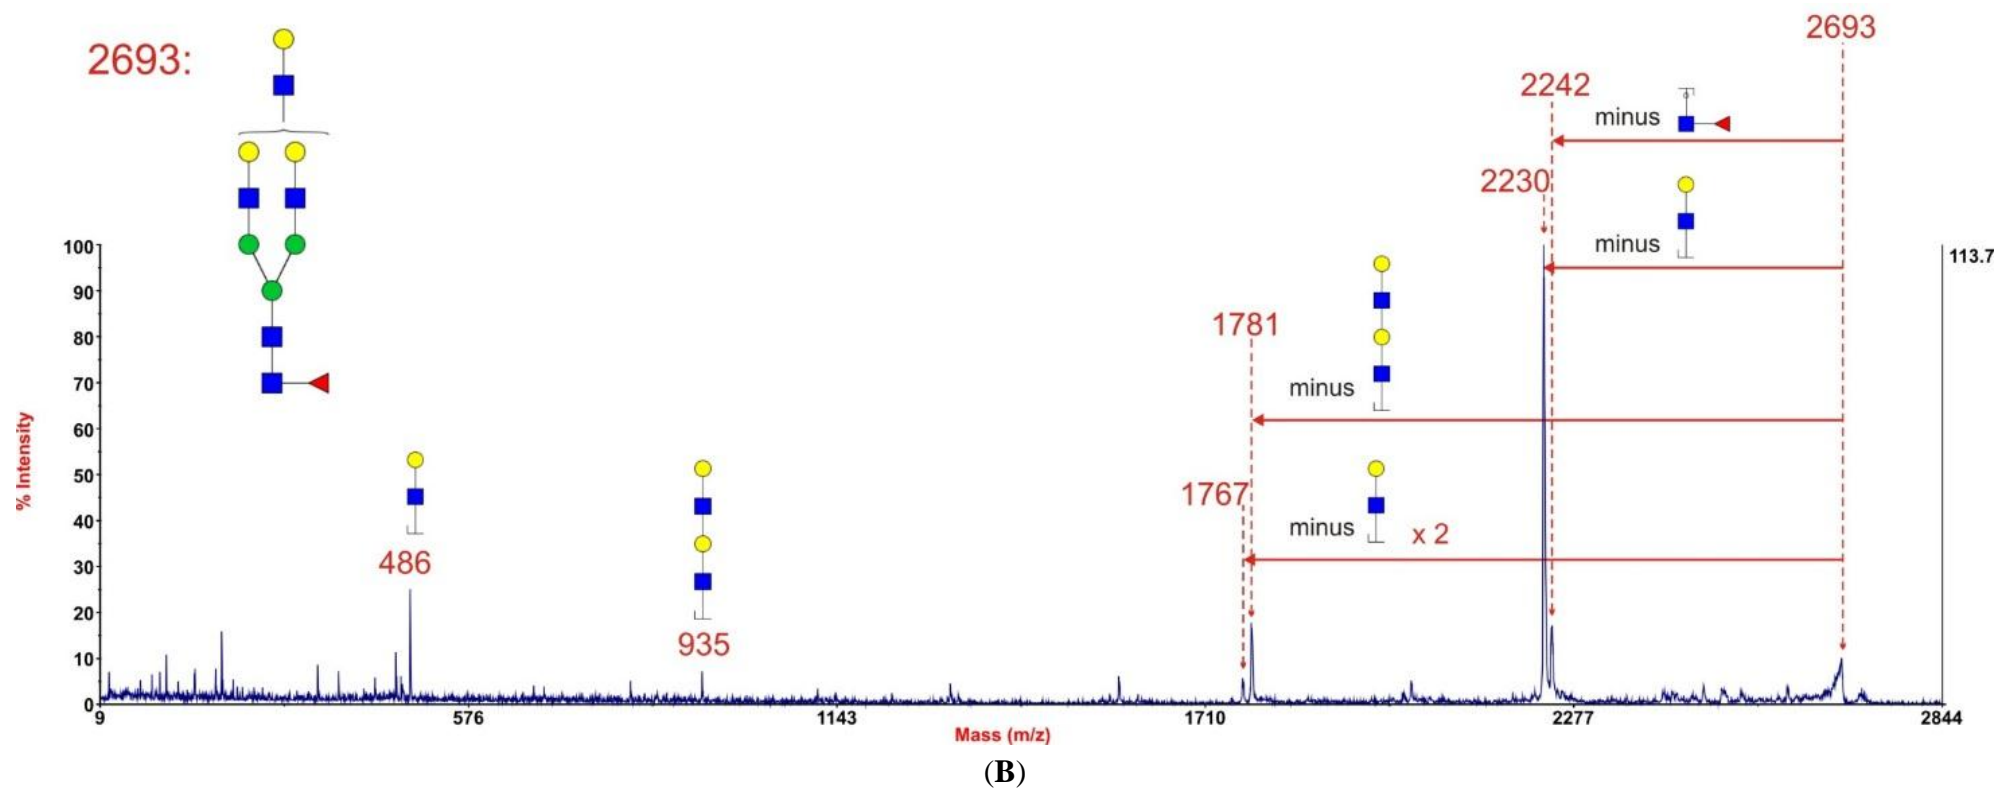

Figure S3. Cont.

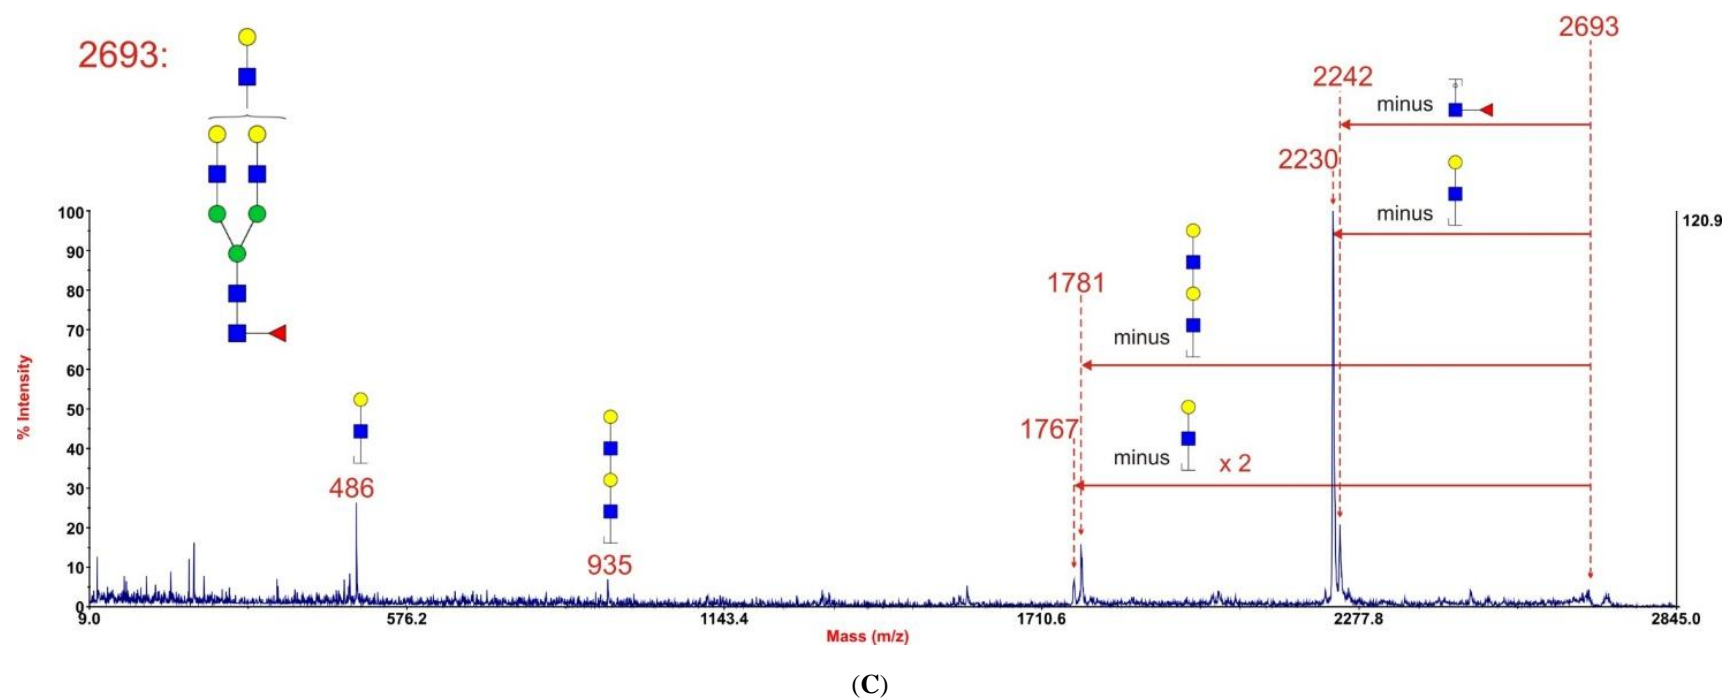

**Figure S3.** MALDI-TOF/TOF MS/MS spectra of the permethylated *N*-glycan at  $m/z$  2693  $[M + Na]^+$  in myoblasts from healthy control 1 (A); *GFPT1* patient 1 (B) and the *DOK7* patient (C) This glycan is a non-sialylated glycan with three lacNAc units ( $m/z$  2693) in the MALDI data (see Figure 1). Two antennae arrangements are consistent with this composition: triantennary and/or biantennary with one LacNAc extension. The MS/MS spectra are dominated by the fragment ion arising from loss of a single terminal LacNAc, this fragment ion can be derived from both the bi- and tri-antennary options. Nevertheless there are several fragment ions that are diagnostic for the extended biantennary structure. These are observed at  $m/z$  935 and 1781. Importantly their abundances relative to the major fragment ions are similar in the three samples. We estimate from abundance comparisons that  $m/z$  2693 is comprised of about 91% tri-antennary and 9% extended bi-antennary structures in healthy control 1, approximately 86% tri-antennary and 14% extended bi-antennary structures in *GFPT1* patient 1, and roughly 88% tri-antennary and 12% extended bi-antennary structures in the *DOK7* patient. Assignments of the fragment ions are indicated on the cartoons and on the spectra the horizontal red arrows show antennae losses whilst antennae-derived fragment ions are annotated with their sequences. ■ GlcNAc, ● Man, ● Gal, ▲ Fuc, ◆ NeuAc.

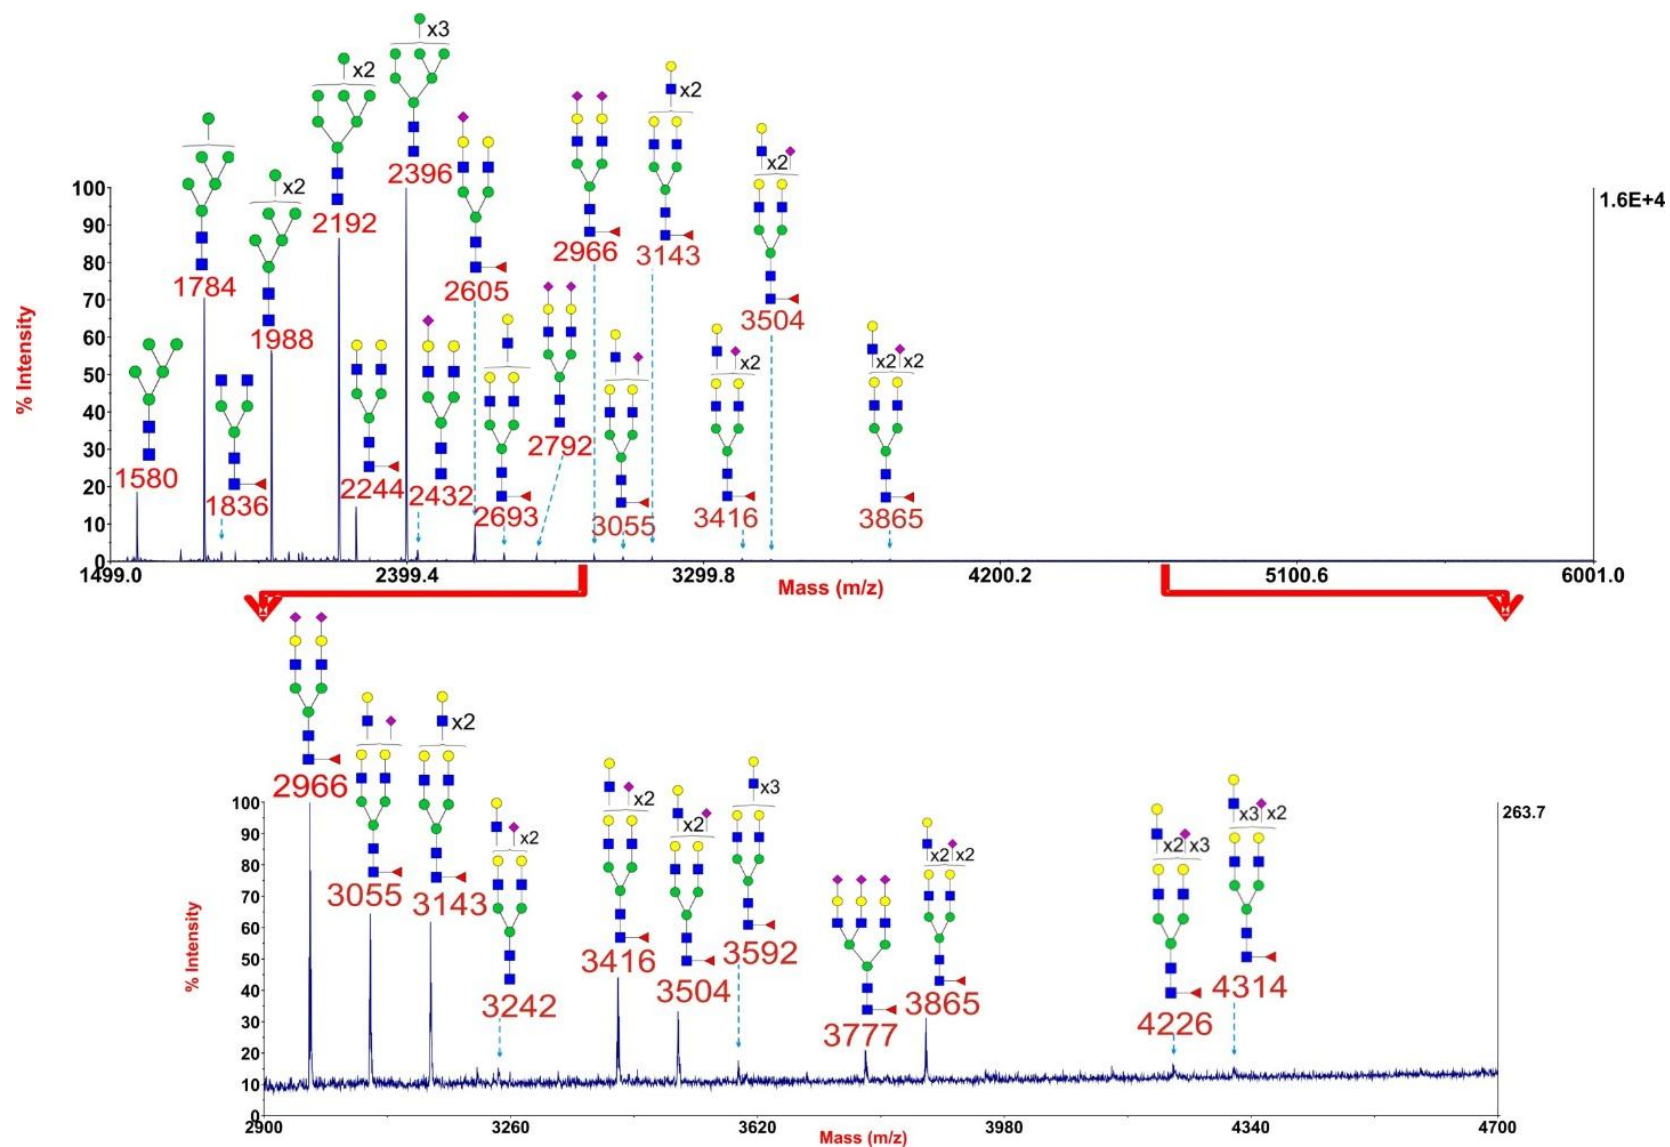

(A)

Figure S4. Cont.



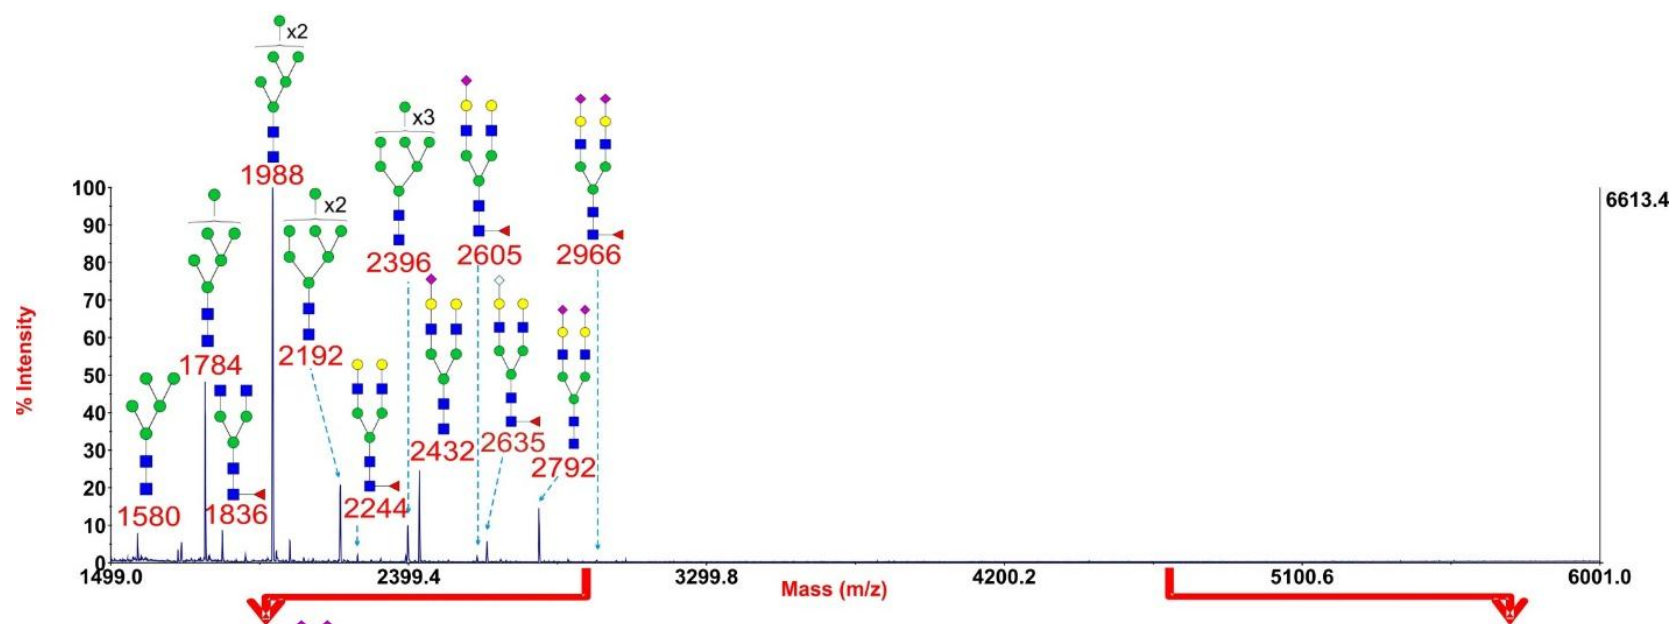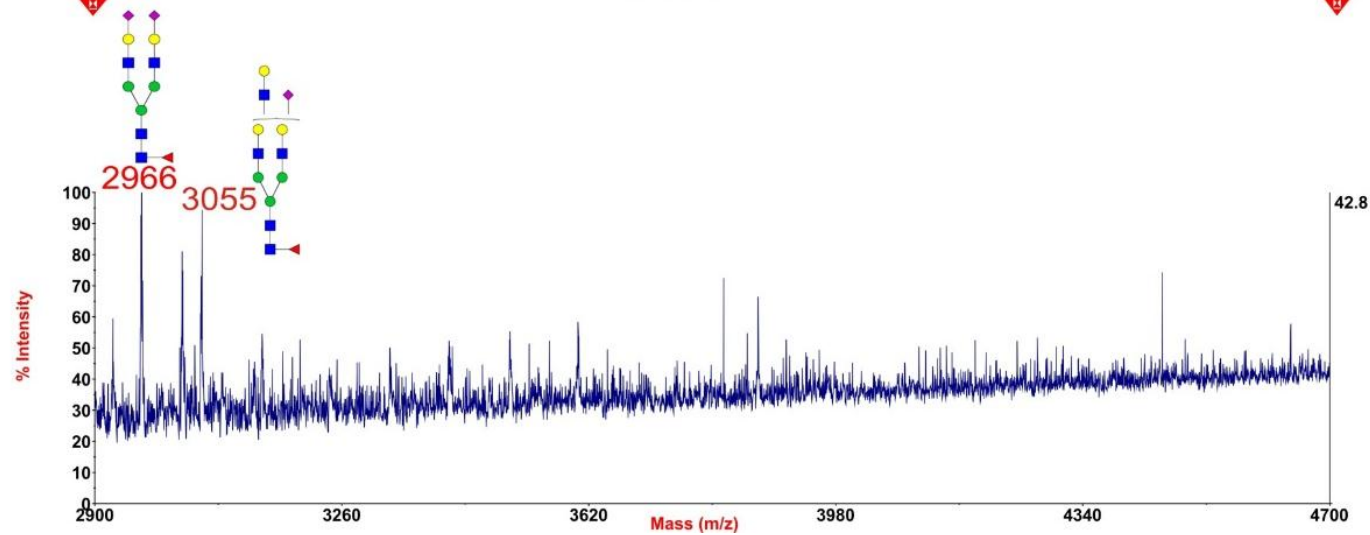

(B)

Figure S4. Cont.

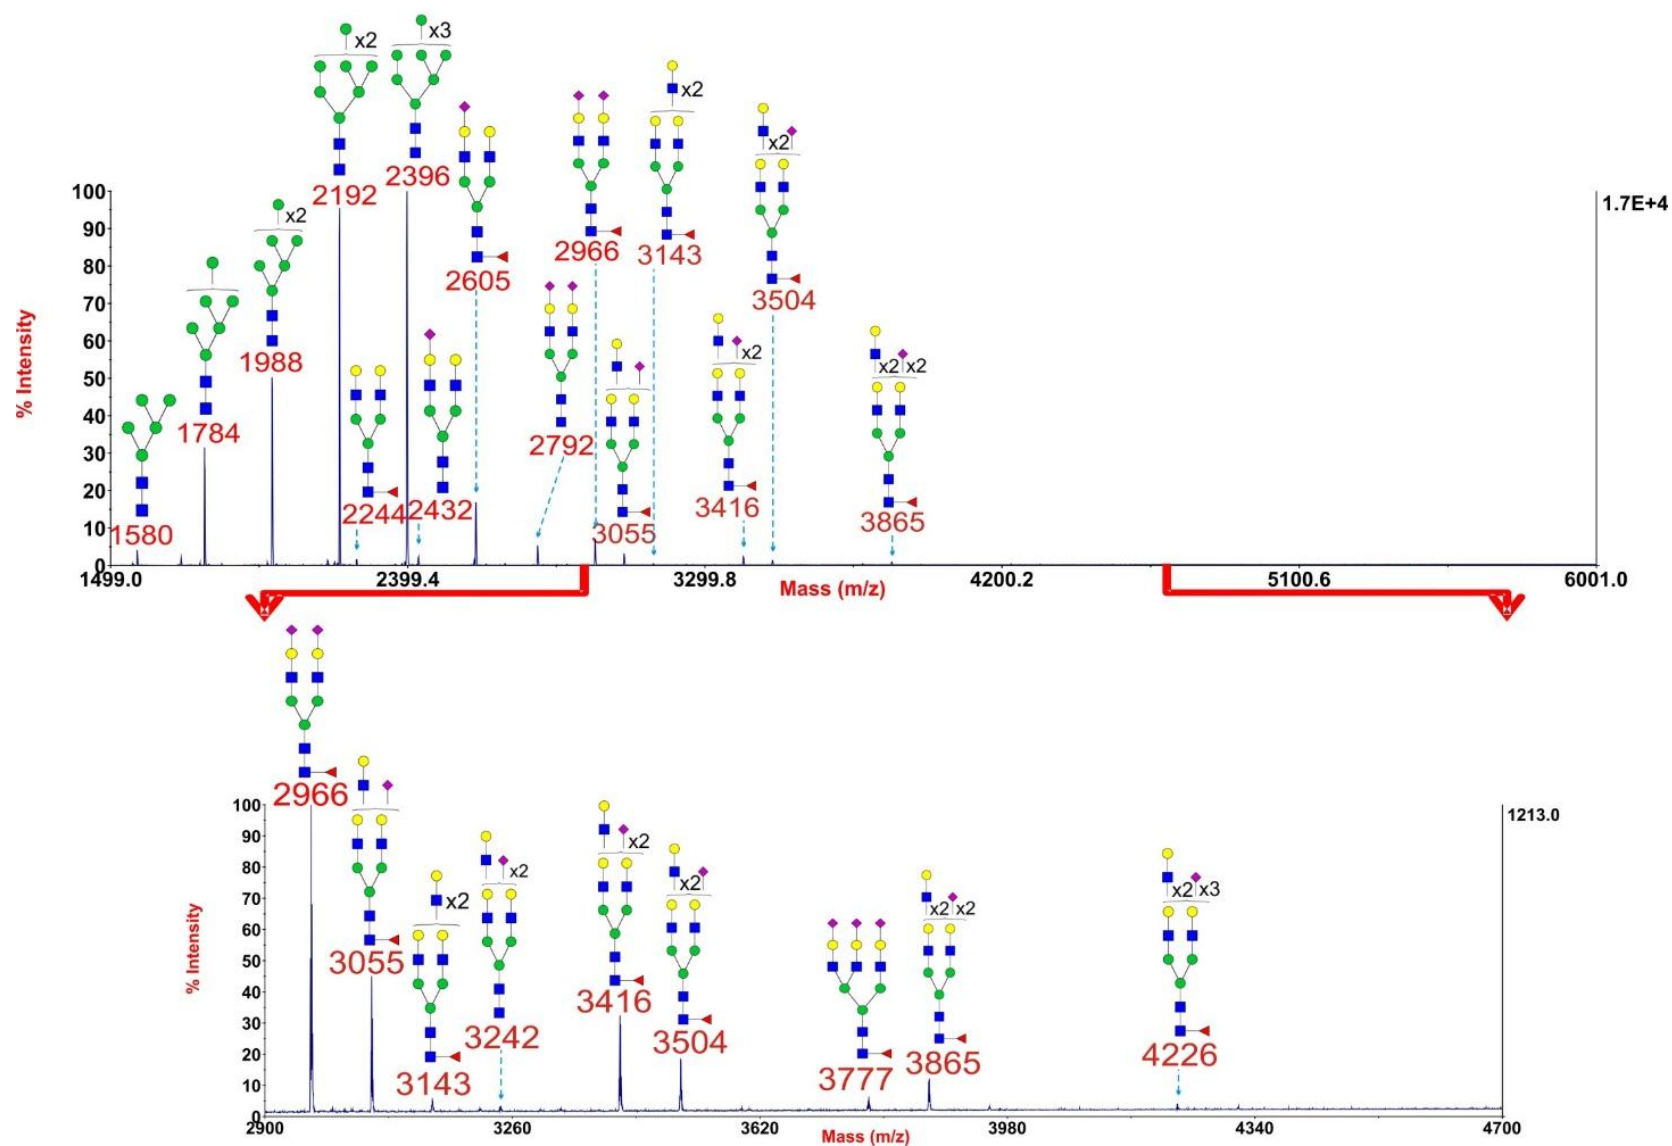

(C)

Figure S4. Cont.

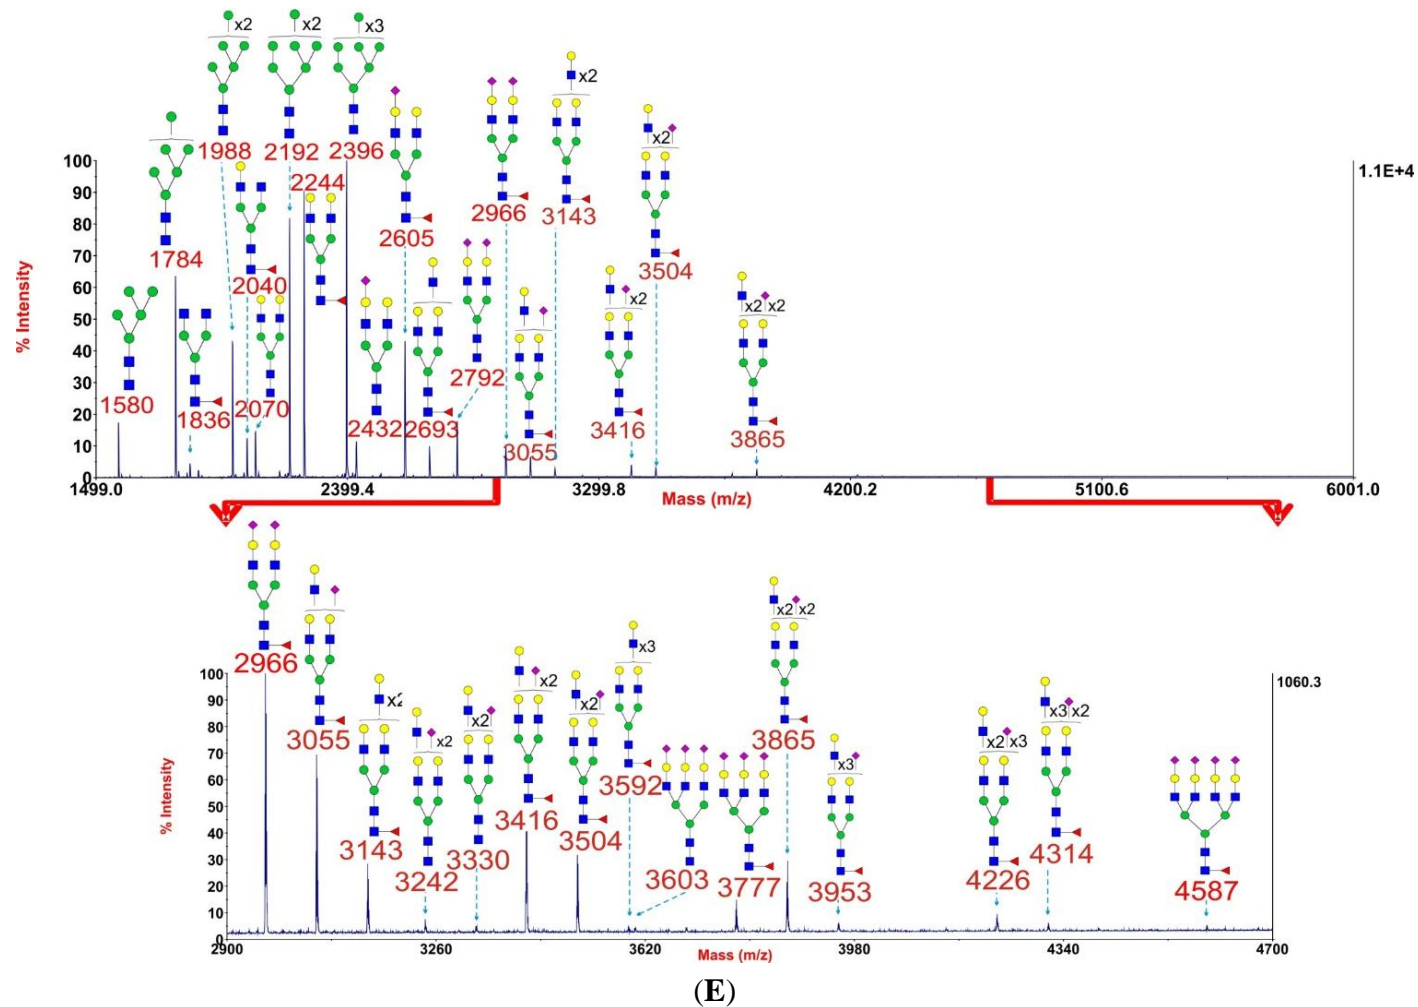

**Figure S4.** Annotated MALDI-TOF MS spectra of permethylated *N*-glycans from myotubes of healthy control 2 (A); *GFPT1* patient 2 (B); the *MTND5* patient (C); limb girdle muscular dystrophy type 2A (LGMD2A) patient (D) and Pompe disease patient (E) In each of A, B, C, D and E, the top panel shows the full spectrum of glycans and the bottom panel amplifies the mass range where the majority of tri- and tetra-antennary glycans are found, the starting point and ending point of which have been indicated by red arrows. Profiles were obtained from the 50% acetonitrile fraction from a C18 Sep-Pak column. All ions are  $[M + Na]^+$ . The number indicated in the spectra is the mass to charge ratio ( $m/z$ )

of the corresponding ion. Since the ion is monocharged, the value of  $m/z$  is equal to the molecular weight value of the glycan. Annotations are based on the molecular weight, *N*-glycan biosynthetic pathway and MS/MS data. Glycans at  $m/z$  2966, 3777 and 4587 are clearly annotated, this is due to the fact that their structures are unequivocal because each antenna is capped with a sialic acid and thus they are homogeneous bi-, tri- and tetraantennary glycans. However, the glycan structure is not always as unequivocal as the glycan at  $m/z$  2966 as biosynthetically non-fully sialylated glycan molecular ion species could be made up of mixtures of structural isoforms. Therefore, for those heterogeneous multiantennary structures with extended LacNAc repeats, the annotations are simplified throughout by using biantennary structures with the extensions and NeuAcs listed outside a bracket. ■ GlcNAc, ● Man, ● Gal, ▲ Fuc, ◆ NeuAc.

### Healthy control 1

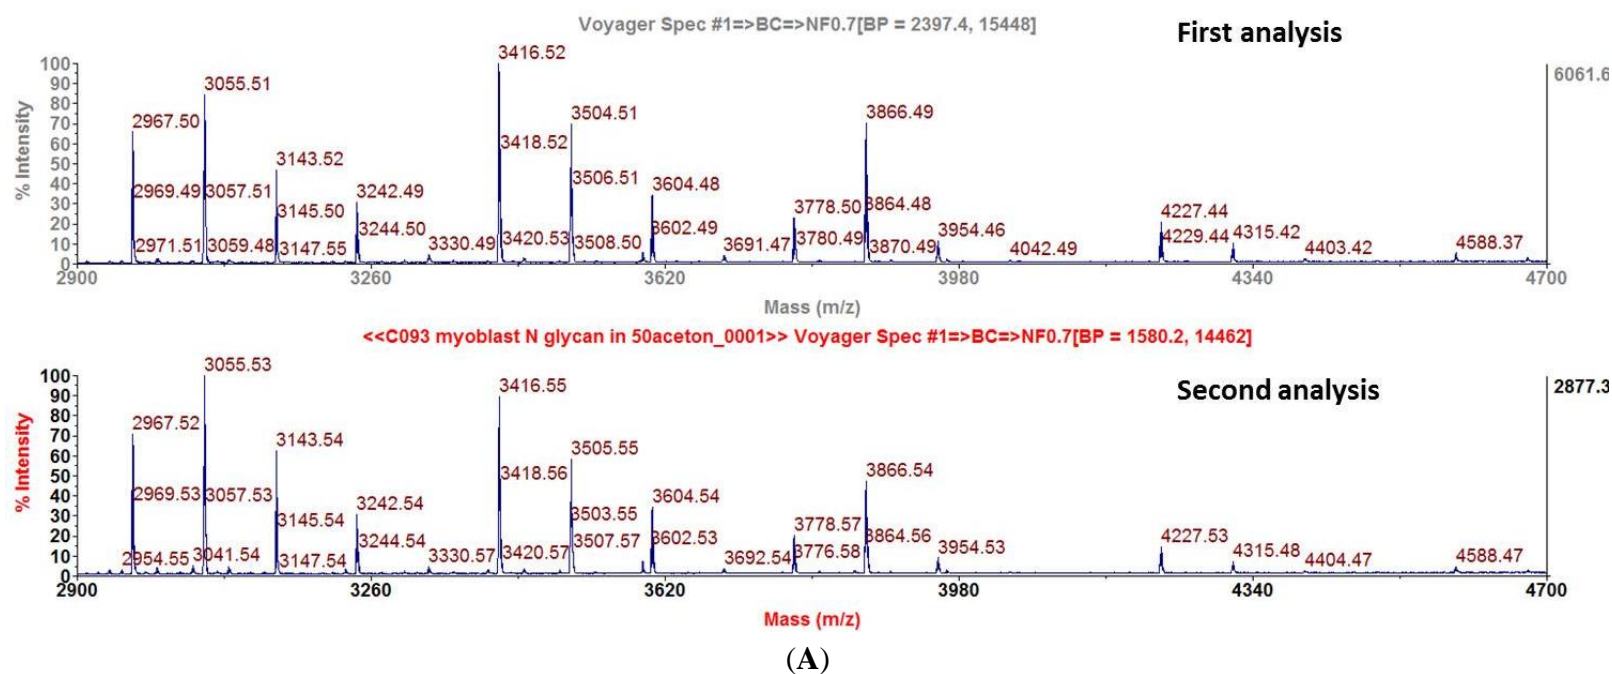

Figure S5. Cont.



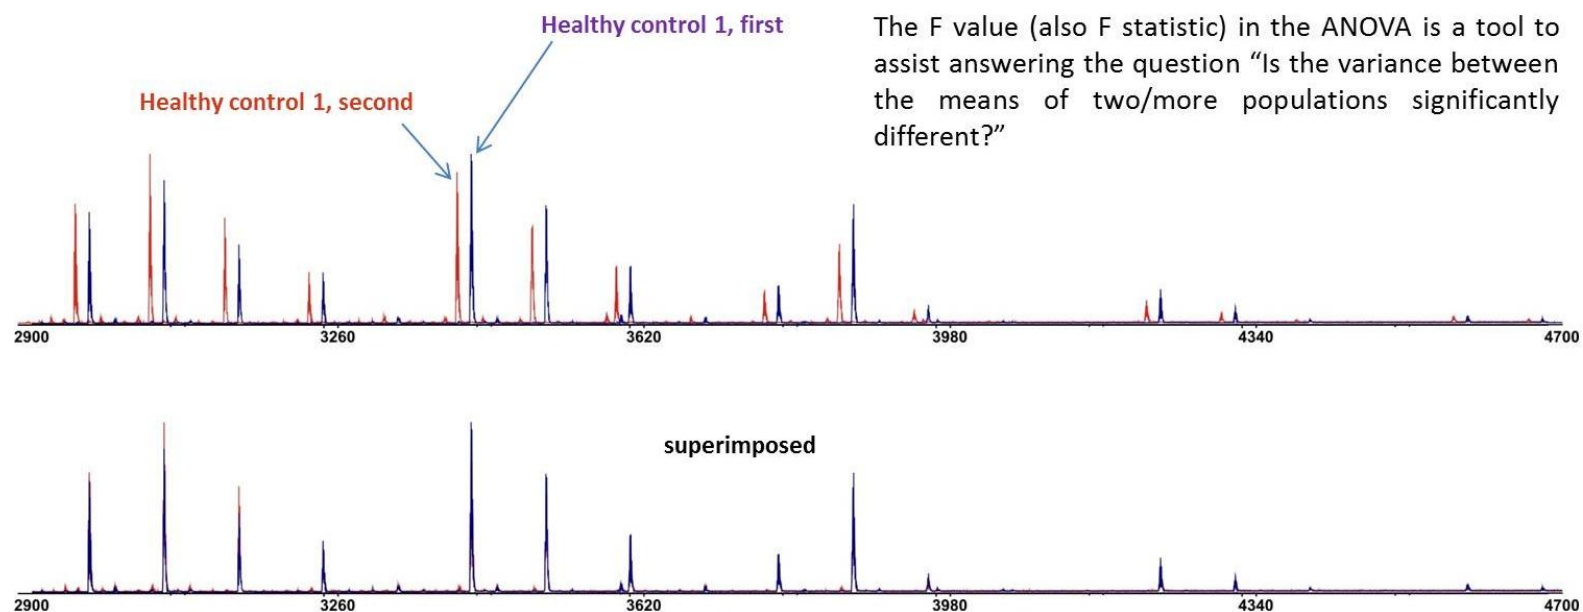

The F value (also F statistic) in the ANOVA is a tool to assist answering the question “Is the variance between the means of two/more populations significantly different?”

| SUMMARY                                     |         |        |         |          |         |            |
|---------------------------------------------|---------|--------|---------|----------|---------|------------|
| Groups                                      | Count   | Sum    | Average | Variance |         |            |
| myoblast healthy control 1, first analysis  | 13      | 5.1361 | 0.3951  | 0.1203   |         |            |
| myoblast healthy control 1, second analysis | 13      | 4.9222 | 0.3786  | 0.1228   |         |            |
| ANOVA                                       |         |        |         |          |         |            |
| Source of Variation                         | SS      | df     | MS      | F        | P-value | F critical |
| Between Groups                              | 0.00176 | 1      | 0.0018  | 0.0145   | 0.9052  | 4.2597     |
| Within Groups                               | 2.91668 | 24     | 0.1215  |          |         |            |
| Total                                       | 2.91844 | 25     |         |          |         |            |

As shown in the table the F value is much smaller than the F critical value, indicating that there is no significant difference between the two groups; thus the data are reproducible.

It should be noted that non-core-fucosylated N-glycans, such as m/z 3603 and 3242 were not involved in this comparison as they were derived from contaminating foetal calf serum (see Results).

The alpha factor chosen was is 0.05.

(B)

Figure S5. Cont.

## Healthy control 2

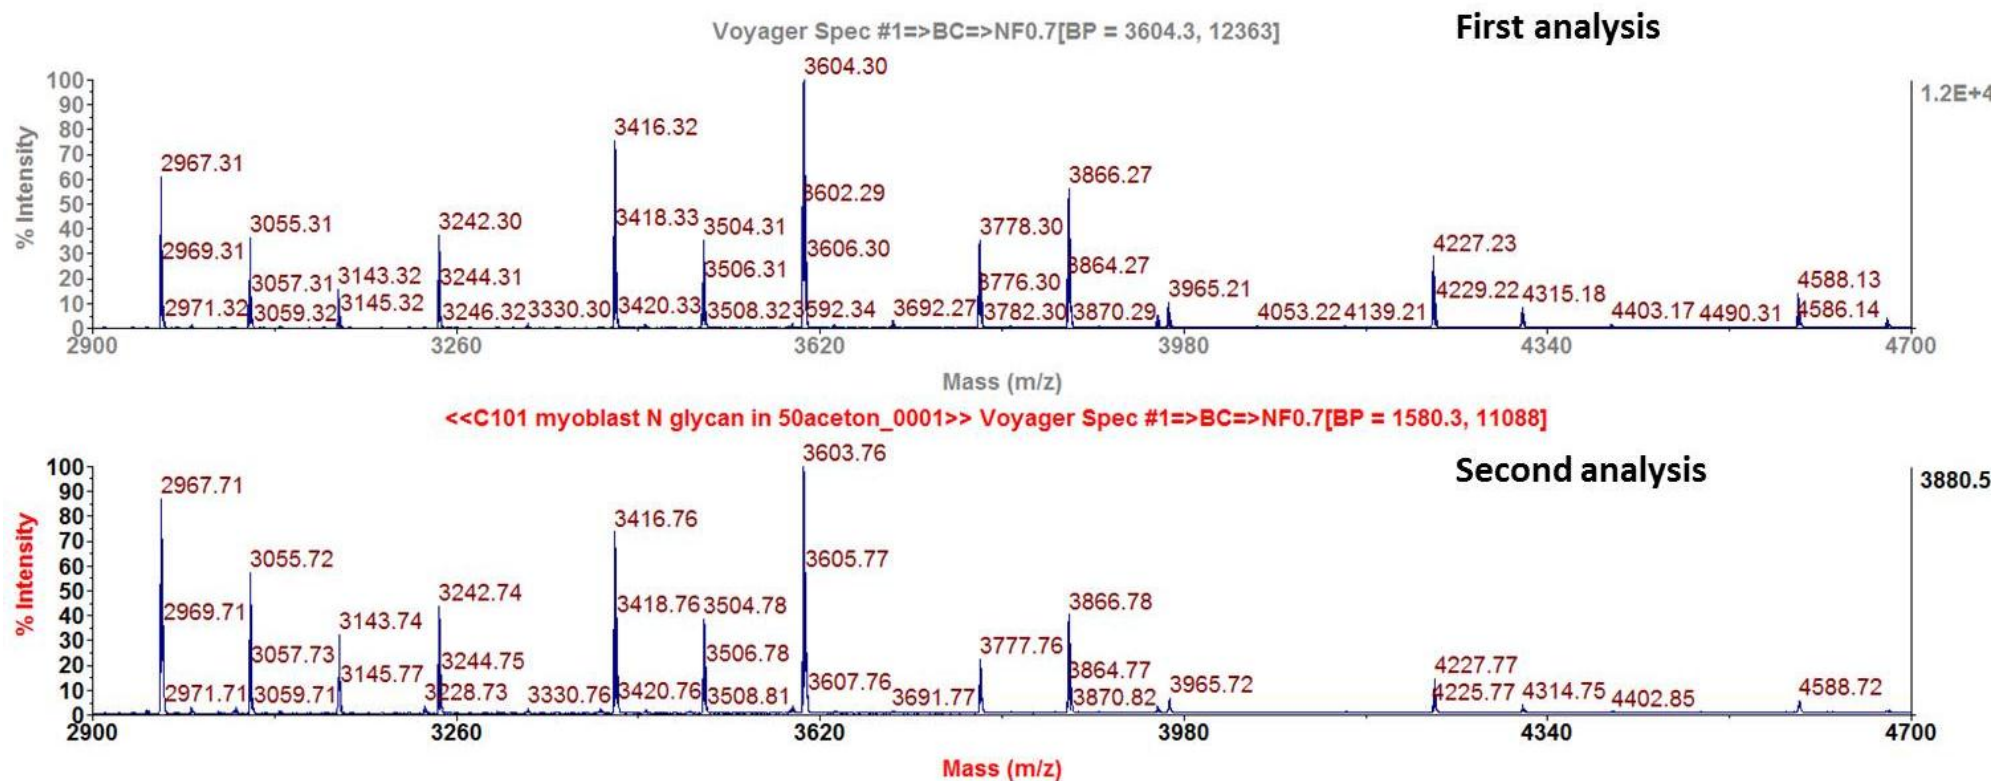

(C)

Figure S5. Cont.

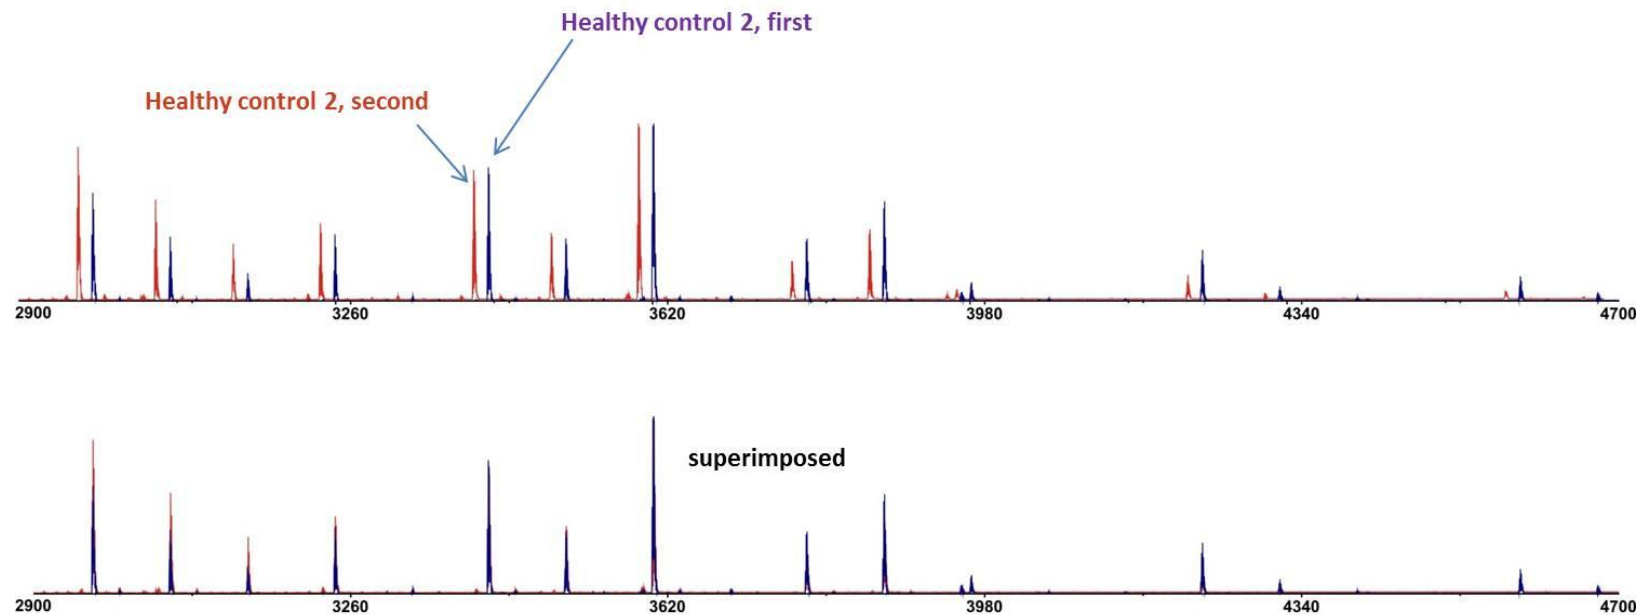

| SUMMARY                                    |       |       |         |          |         |            |
|--------------------------------------------|-------|-------|---------|----------|---------|------------|
| Groups                                     | Count | Sum   | Average | Variance |         |            |
| myoblast healthy control 2, first analysis | 14    | 3.758 | 0.268   | 0.0586   |         |            |
| myoblast healthy control 2, first analysis | 14    | 3.804 | 0.272   | 0.0828   |         |            |
| ANOVA                                      |       |       |         |          |         |            |
| Source of Variation                        | SS    | df    | MS      | F        | P-value | F critical |
| Between Groups                             | 8E-05 | 1     | 8E-05   | 0.0011   | 0.974   | 4.225      |
| Within Groups                              | 1.838 | 26    | 0.071   |          |         |            |
| Total                                      | 1.838 | 27    |         |          |         |            |

(D)

Figure S5. Cont.

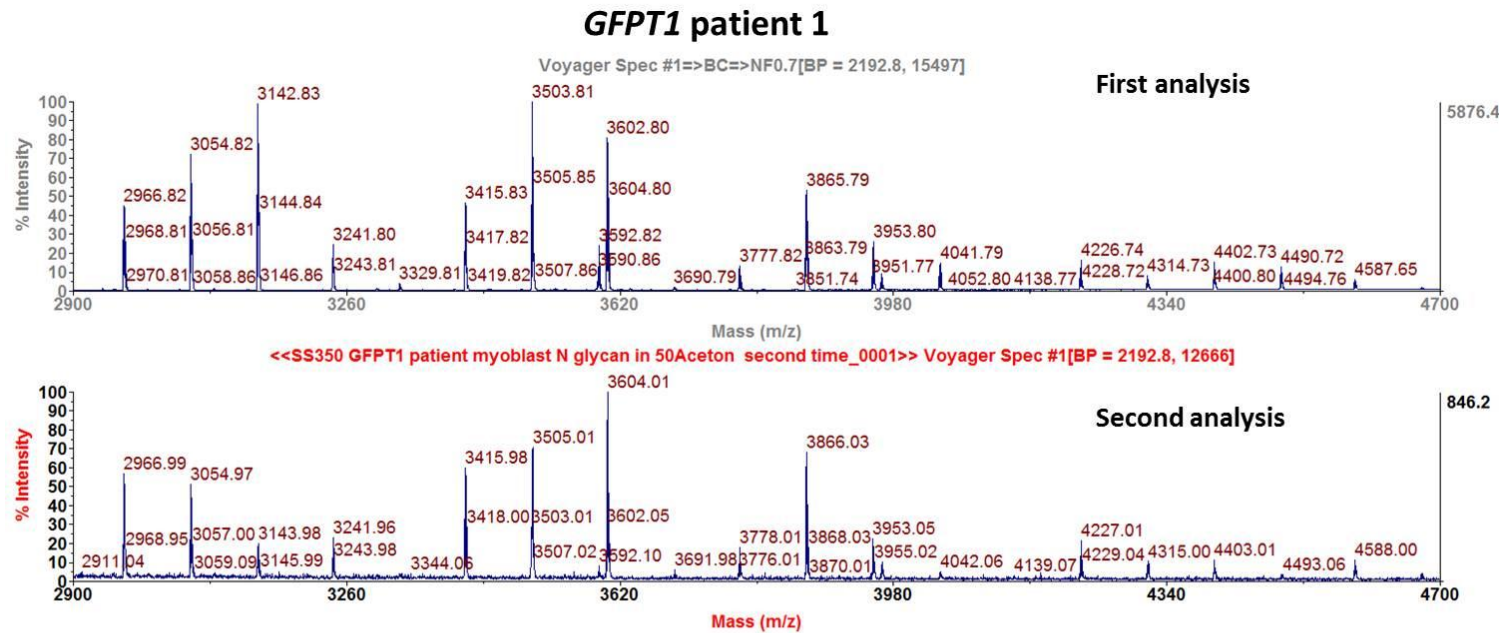

| Anova: Single Factor             |         |        |         |          |         |            |
|----------------------------------|---------|--------|---------|----------|---------|------------|
| SUMMARY                          |         |        |         |          |         |            |
| Groups                           | Count   | Sum    | Average | Variance |         |            |
| GFPT1 patient 1, first analysis  | 14      | 5.4019 | 0.3858  | 0.1034   |         |            |
| GFPT1 patient 1, second analysis | 14      | 4.3793 | 0.3128  | 0.0571   |         |            |
| ANOVA                            |         |        |         |          |         |            |
| Source of Variation              | SS      | df     | MS      | F        | P-value | F critical |
| Between Groups                   | 0.03735 | 1      | 0.0373  | 0.4656   | 0.5011  | 4.2252     |
| Within Groups                    | 2.08577 | 26     | 0.0802  |          |         |            |
| Total                            | 2.12312 | 27     |         |          |         |            |

(E)

Figure S5. Cont.



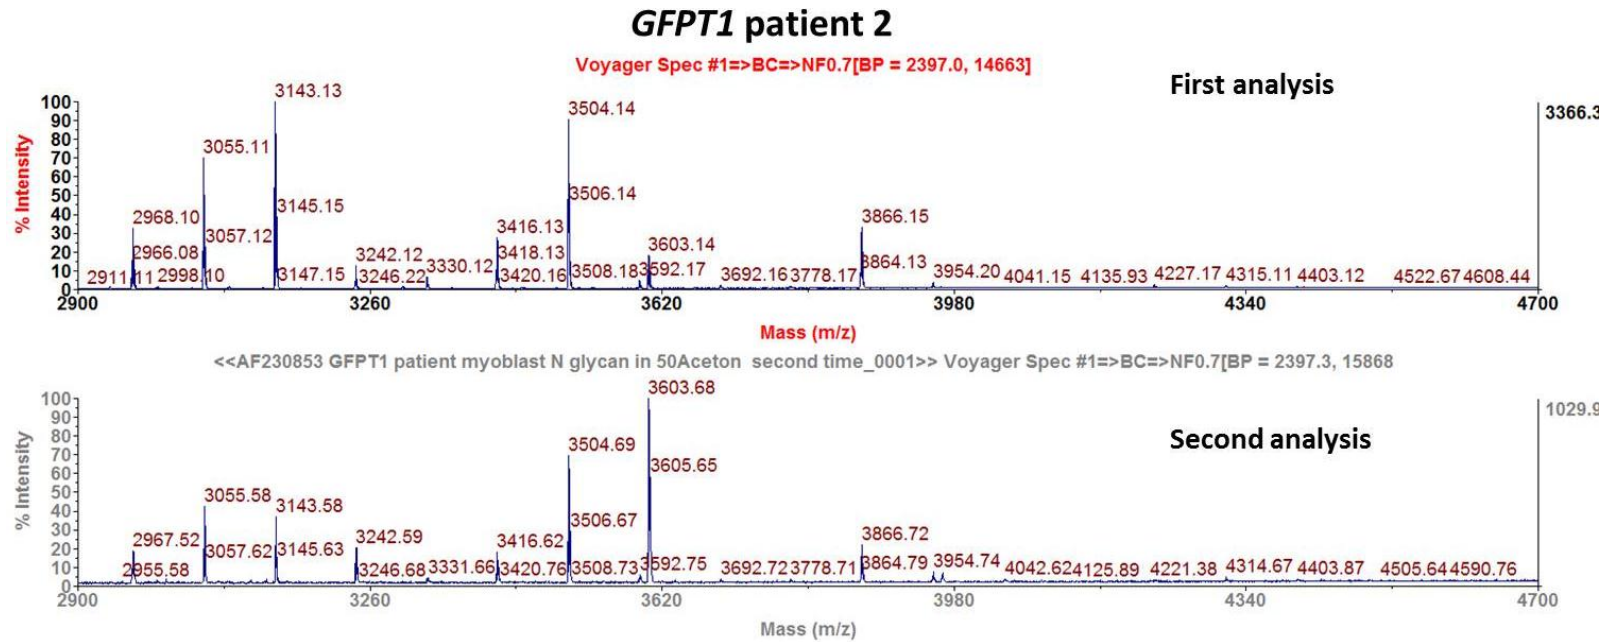

| Anova: Single Factor             |         |        |         |          |         |            |
|----------------------------------|---------|--------|---------|----------|---------|------------|
| SUMMARY                          |         |        |         |          |         |            |
| Groups                           | Count   | Sum    | Average | Variance |         |            |
| GFPT1 patient 2, first analysis  | 14      | 3.7134 | 0.2652  | 0.1245   |         |            |
| GFPT1 patient 2, second analysis | 14      | 2.4057 | 0.1718  | 0.0396   |         |            |
| ANOVA                            |         |        |         |          |         |            |
| Source of Variation              | SS      | df     | MS      | F        | P-value | F critical |
| Between Groups                   | 0.06108 | 1      | 0.0611  | 0.7445   | 0.3961  | 4.2252     |
| Within Groups                    | 2.13296 | 26     | 0.082   |          |         |            |
| Total                            | 2.19404 | 27     |         |          |         |            |

(F)

Figure S5. Cont.

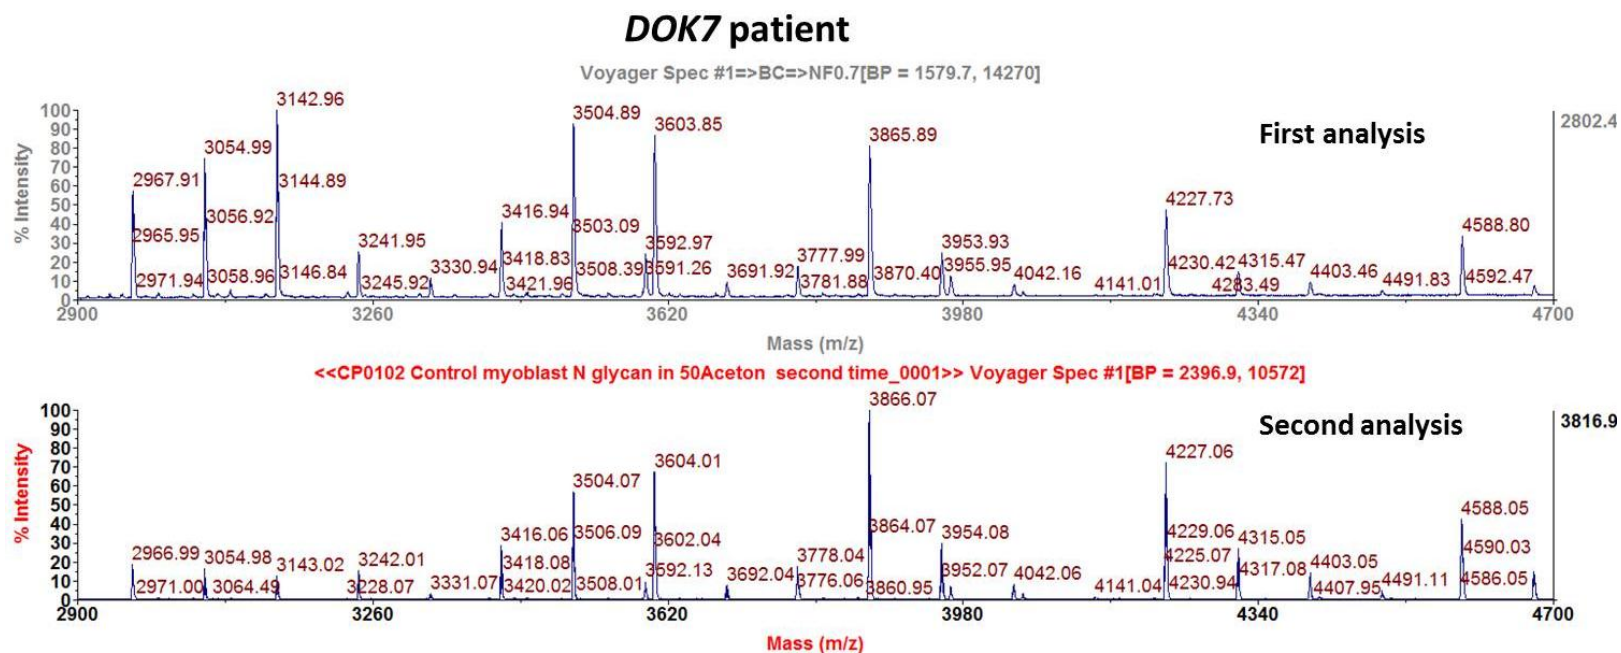

Anova: Single Factor

| SUMMARY                       |         |        |         |          |         |            |
|-------------------------------|---------|--------|---------|----------|---------|------------|
| Groups                        | Count   | Sum    | Average | Variance |         |            |
| DOK7 patient, first analysis  | 14      | 6.2575 | 0.447   | 0.0991   |         |            |
| DOK7 patient, second analysis | 14      | 4.5356 | 0.324   | 0.0722   |         |            |
| ANOVA                         |         |        |         |          |         |            |
| Source of Variation           | SS      | df     | MS      | F        | P-value | F critical |
| Between Groups                | 0.1059  | 1      | 0.1059  | 1.236    | 0.2764  | 4.2252     |
| Within Groups                 | 2.22756 | 26     | 0.0857  |          |         |            |
| Total                         | 2.33346 | 27     |         |          |         |            |

(G)

Figure S5. Cont.

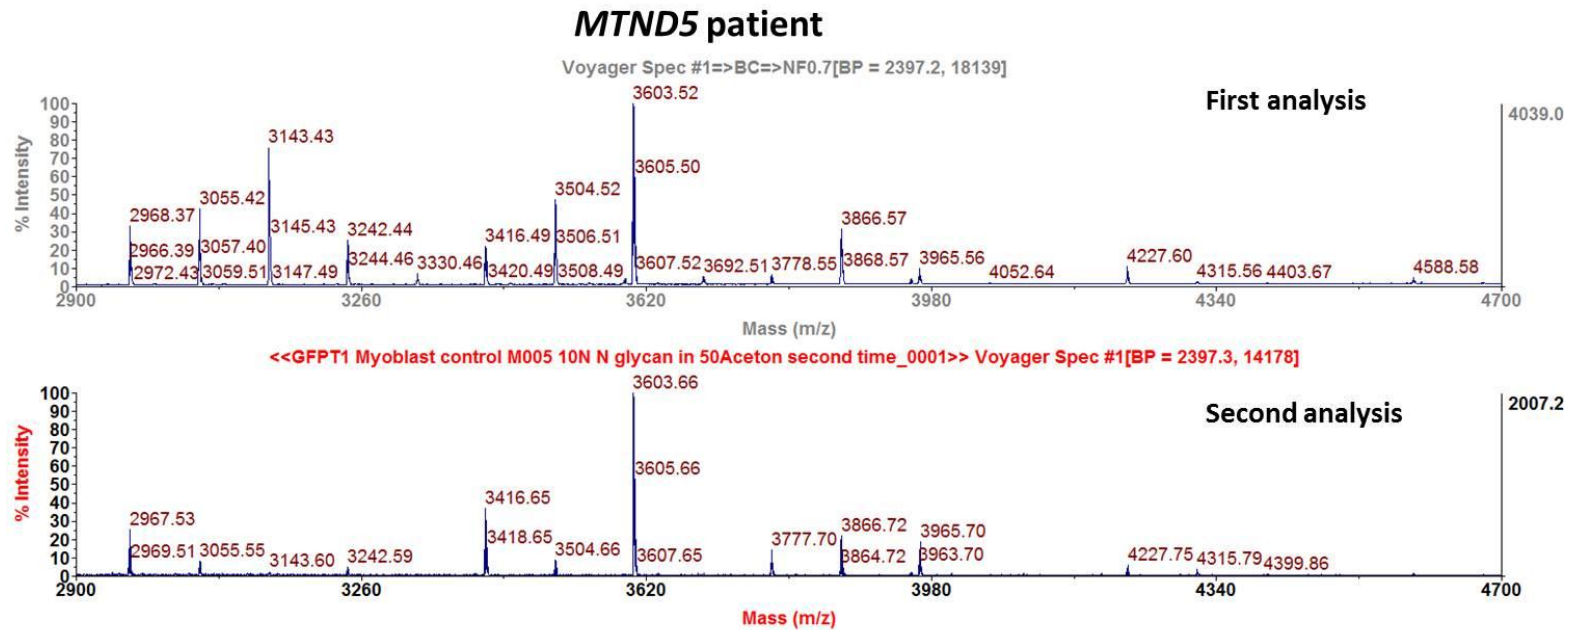

Anova: Single Factor

| Groups                         | Count | Sum    | Average | Variance |
|--------------------------------|-------|--------|---------|----------|
| MTND5 patient, first analysis  | 14    | 2.892  | 0.2066  | 0.0505   |
| MTND5 patient, second analysis | 14    | 1.3366 | 0.0955  | 0.0121   |

  

| Source of Variation | SS      | df | MS     | F     | P-value | F critical |
|---------------------|---------|----|--------|-------|---------|------------|
| Between Groups      | 0.0864  | 1  | 0.0864 | 2.759 | 0.1087  | 4.2252     |
| Within Groups       | 0.81422 | 26 | 0.0313 |       |         |            |
| Total               | 0.90063 | 27 |        |       |         |            |

(H)

Figure S5. Cont.

## Additional Samples

| Anova: Single Factor       |         |        |         |          |         |            |
|----------------------------|---------|--------|---------|----------|---------|------------|
| SUMMARY                    |         |        |         |          |         |            |
| Groups                     | Count   | Sum    | Average | Variance |         |            |
| myoblast healthy control 1 | 14      | 5.1907 | 0.3708  | 0.1193   |         |            |
| myoblast healthy control 2 | 14      | 3.7575 | 0.2684  | 0.0586   |         |            |
| GFPT1 patient 1            | 14      | 5.4019 | 0.3858  | 0.1034   |         |            |
| GFPT1 patient 2            | 14      | 3.7134 | 0.2652  | 0.1245   |         |            |
| DOK7 patient               | 14      | 6.2575 | 0.447   | 0.0991   |         |            |
| MTND5 patient              | 14      | 2.892  | 0.2066  | 0.0505   |         |            |
| LGMD2A patient             | 14      | 4.5738 | 0.3267  | 0.0855   |         |            |
| Pompe disease patient      | 14      | 5.9821 | 0.4273  | 0.1642   |         |            |
| ANOVA                      |         |        |         |          |         |            |
| Source of Variation        | SS      | df     | MS      | F        | P-value | F critical |
| Between Groups             | 0.71043 | 7      | 0.1015  | 1.0085   | 0.4297  | 2.0989     |
| Within Groups              | 10.4658 | 104    | 0.1006  |          |         |            |
| Total                      | 11.1763 | 111    |         |          |         |            |

(I)

Figure S5. Cont.



## ANOVA analysis of MS/MS data

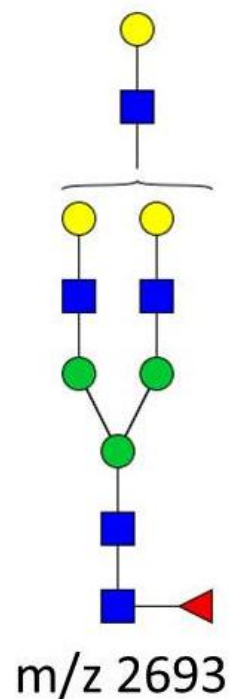

| Anova: Single Factor       |          |          |          |          |          |            |
|----------------------------|----------|----------|----------|----------|----------|------------|
| SUMMARY                    |          |          |          |          |          |            |
| Groups                     | Count    | Sum      | Average  | Variance |          |            |
| myoblast healthy control 1 | 7        | 1.846981 | 0.263854 | 0.110998 |          |            |
| myoblast healthy control 2 | 7        | 1.744782 | 0.249255 | 0.117039 |          |            |
| GFPT1 patient 1            | 7        | 1.773967 | 0.253424 | 0.114121 |          |            |
| GFPT1 patient 2            | 7        | 1.658956 | 0.236994 | 0.118663 |          |            |
| DOK7 patient               | 7        | 1.497809 | 0.213973 | 0.122863 |          |            |
| MTND5 patient              | 7        | 1.638627 | 0.23409  | 0.116751 |          |            |
| LGMD2A patient             | 7        | 1.424044 | 0.203435 | 0.12499  |          |            |
| Pompe disease patient      | 7        | 1.613139 | 0.230448 | 0.118103 |          |            |
| ANOVA                      |          |          |          |          |          |            |
| Source of Variation        | SS       | df       | MS       | F        | P-value  | F critical |
| Between Groups             | 0.019848 | 7        | 0.002835 | 0.024042 | 0.999984 | 2.207436   |
| Within Groups              | 5.661162 | 48       | 0.117941 |          |          |            |
| Total                      | 5.681011 | 55       |          |          |          |            |

(J)

Figure S5. Cont.



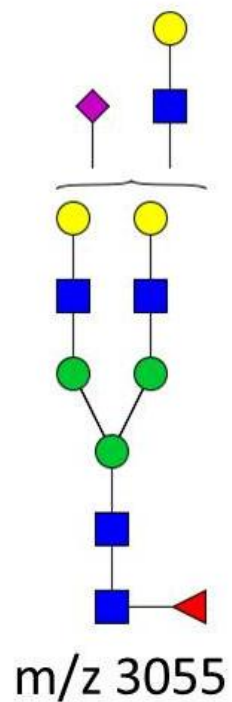

| Anova: Single Factor       |          |          |          |          |         |            |
|----------------------------|----------|----------|----------|----------|---------|------------|
| SUMMARY                    |          |          |          |          |         |            |
| Groups                     | Count    | Sum      | Average  | Variance |         |            |
| myoblast healthy control 1 | 15       | 3.221139 | 0.214743 | 0.084465 |         |            |
| myoblast healthy control 2 | 15       | 3.007335 | 0.200489 | 0.077004 |         |            |
| GFPT1 patient 1            | 15       | 3.217751 | 0.214517 | 0.077672 |         |            |
| GFPT1 patient 2            | 15       | 3.143243 | 0.20955  | 0.067485 |         |            |
| DOK7 patient               | 15       | 2.827649 | 0.18851  | 0.072329 |         |            |
| MTND5 patient              | 15       | 2.869131 | 0.191275 | 0.072697 |         |            |
| LGMD2A patient             | 15       | 2.887922 | 0.192528 | 0.07004  |         |            |
| Pompe disease patient      | 15       | 3.211432 | 0.214095 | 0.073406 |         |            |
| ANOVA                      |          |          |          |          |         |            |
| Source of Variation        | SS       | df       | MS       | F        | P-value | F critical |
| Between Groups             | 0.013493 | 7        | 0.001928 | 0.025913 | 0.99998 | 2.092381   |
| Within Groups              | 8.331362 | 112      | 0.074387 |          | 1       |            |
| Total                      | 8.344855 | 119      |          |          |         |            |

(K)

Figure S5. Cont.

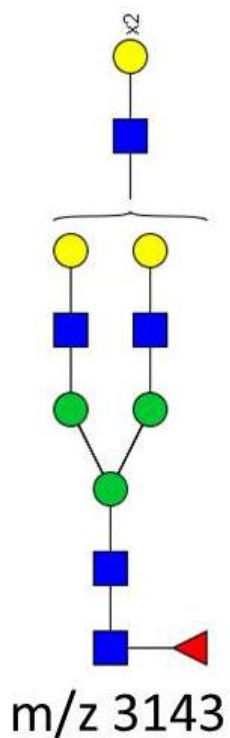

| Anova: Single Factor       |          |          |          |          |         |            |
|----------------------------|----------|----------|----------|----------|---------|------------|
| SUMMARY                    |          |          |          |          |         |            |
| Groups                     | Count    | Sum      | Average  | Variance |         |            |
| myoblast healthy control 1 | 10       | 1.554012 | 0.155401 | 0.090348 |         |            |
| myoblast healthy control 2 | 10       | 1.605102 | 0.16051  | 0.088959 |         |            |
| GFPT1 patient 1            | 10       | 1.543141 | 0.154314 | 0.09061  |         |            |
| GFPT1 patient 2            | 10       | 1.602429 | 0.160243 | 0.090208 |         |            |
| DOK7 patient               | 10       | 1.529101 | 0.15291  | 0.09086  |         |            |
| MTND5 patient              | 10       | 1.531205 | 0.15312  | 0.090842 |         |            |
| LGMD2A patient             | 10       | 1.395141 | 0.139514 | 0.092785 |         |            |
| Pompe disease patient      | 10       | 1.498925 | 0.149892 | 0.091328 |         |            |
| ANOVA                      |          |          |          |          |         |            |
| Source of Variation        | SS       | df       | MS       | F        | P-value | F critical |
| Between Groups             | 0.003075 | 7        | 0.000439 | 0.00484  | 1       | 2.139656   |
| Within Groups              | 6.533456 | 72       | 0.090742 |          |         |            |
| Total                      | 6.536531 | 79       |          |          |         |            |

(L)

Figure S5. Cont.

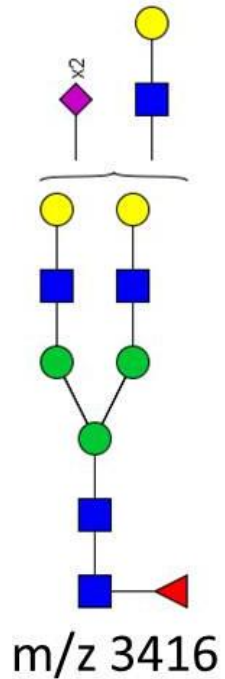

| Anova: Single Factor       |          |          |          |          |         |            |
|----------------------------|----------|----------|----------|----------|---------|------------|
| SUMMARY                    |          |          |          |          |         |            |
| Groups                     | Count    | Sum      | Average  | Variance |         |            |
| myoblast healthy control 1 | 12       | 3.666897 | 0.305575 | 0.187442 |         |            |
| myoblast healthy control 2 | 12       | 3.41037  | 0.284198 | 0.102746 |         |            |
| GFPT1 patient 1            | 12       | 3.039815 | 0.253318 | 0.094479 |         |            |
| GFPT1 patient 2            | 12       | 3.2147   | 0.267892 | 0.102098 |         |            |
| DOK7 patient               | 12       | 3.533928 | 0.294494 | 0.151509 |         |            |
| MTND5 patient              | 12       | 3.290426 | 0.274202 | 0.147745 |         |            |
| LGMD2A patient             | 12       | 3.415446 | 0.284621 | 0.146992 |         |            |
| Pompe disease patient      | 12       | 3.739437 | 0.31162  | 0.201239 |         |            |
| ANOVA                      |          |          |          |          |         |            |
| Source of Variation        | SS       | df       | MS       | F        | P-value | F critical |
| Between Groups             | 0.031606 | 7        | 0.004515 | 0.031846 | 0.99996 | 2.115472   |
| Within Groups              | 12.47676 | 88       | 0.141781 |          |         |            |
| Total                      | 12.50837 | 95       |          |          |         |            |

(M)

Figure S5. Cont.

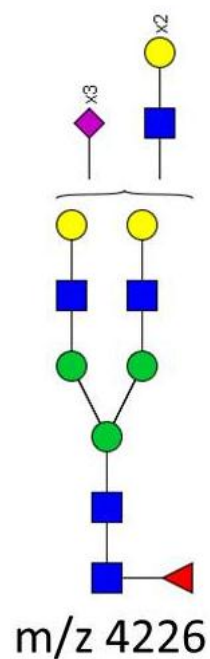

| Anova: Single Factor       |          |          |          |          |          |            |
|----------------------------|----------|----------|----------|----------|----------|------------|
| SUMMARY                    |          |          |          |          |          |            |
| Groups                     | Count    | Sum      | Average  | Variance |          |            |
| myoblast healthy control 1 | 12       | 3.765016 | 0.313751 | 0.166213 |          |            |
| myoblast healthy control 2 | 12       | 2.44387  | 0.203656 | 0.084358 |          |            |
| GFPT1 patient 1            | 12       | 3.092784 | 0.257732 | 0.093789 |          |            |
| GFPT1 patient 2            | 12       | 3.830986 | 0.319249 | 0.09056  |          |            |
| DOK7 patient               | 12       | 2.797297 | 0.233108 | 0.105456 |          |            |
| MTND5 patient              | 12       | 2.521792 | 0.210149 | 0.102864 |          |            |
| LGMD2A patient             | 12       | 2.97479  | 0.247899 | 0.115249 |          |            |
| Pompe disease patient      | 12       | 3.843511 | 0.320293 | 0.329943 |          |            |
| ANOVA                      |          |          |          |          |          |            |
| Source of Variation        | SS       | df       | MS       | F        | P-value  | F critical |
| Between Groups             | 0.197831 | 7        | 0.028262 | 0.207723 | 0.982901 | 2.115472   |
| Within Groups              | 11.97276 | 88       | 0.136054 |          |          |            |
| Total                      | 12.17059 | 95       |          |          |          |            |

(N)

**Figure S5.** ANOVA analysis of myoblasts MS data (A–I) and MS/MS data (J–N). ■ GlcNAc, ● Man, ● Gal, ▲ Fuc, ◆ NeuAc.
